# Supplementary material for: Premature adult mortality in India: what is the size of the matter?
Source: PubMed Central journal article supplement — BMJ Glob Health. 2021 Jun 16;6(6):e004451. doi: 10.1136/bmjgh-2020-004451 (PMC8211056; doi:10.1136/bmjgh-2020-004451), 2021-06-16

### **Appendix 3: List of abbreviations, and age-specific mortality probabilities between ages 30 and 70, by source, sex, and state.**

#### **List of abbreviations**

- 5q0: Probability of death between ages 0 and 5
- 45q15: Probability of death between ages 15 and 60
- 40q30: Probability of death between ages 30 and 70
- CRS: Civil Registration System
- CRVS: Civil Registration and Vital Statistics
- GBD: Global Burden of Disease
- IHME: Institute of Health Metrics and Evaluation
- LE: Life expectancy
- Log-Quad: Log-Quadratic Mortality Model
- MODMATCH: Modified Logit Life Table System
- NBE: National Burden of Disease Estimates
- NCDs: Non-Communicable Diseases
- NCP: National Commission on Population
- NFHS: National Family Health Survey
- SRS: Sample Registration System
- SVD-Comp: Singular Value Decomposition Mortality Model
- UNSDGs: United Nations Sustainable Development Goals

**Appendix 3A: Mortality probabilities by place, source, and sex**

**Adult mortality probability in Andhra Pradesh**

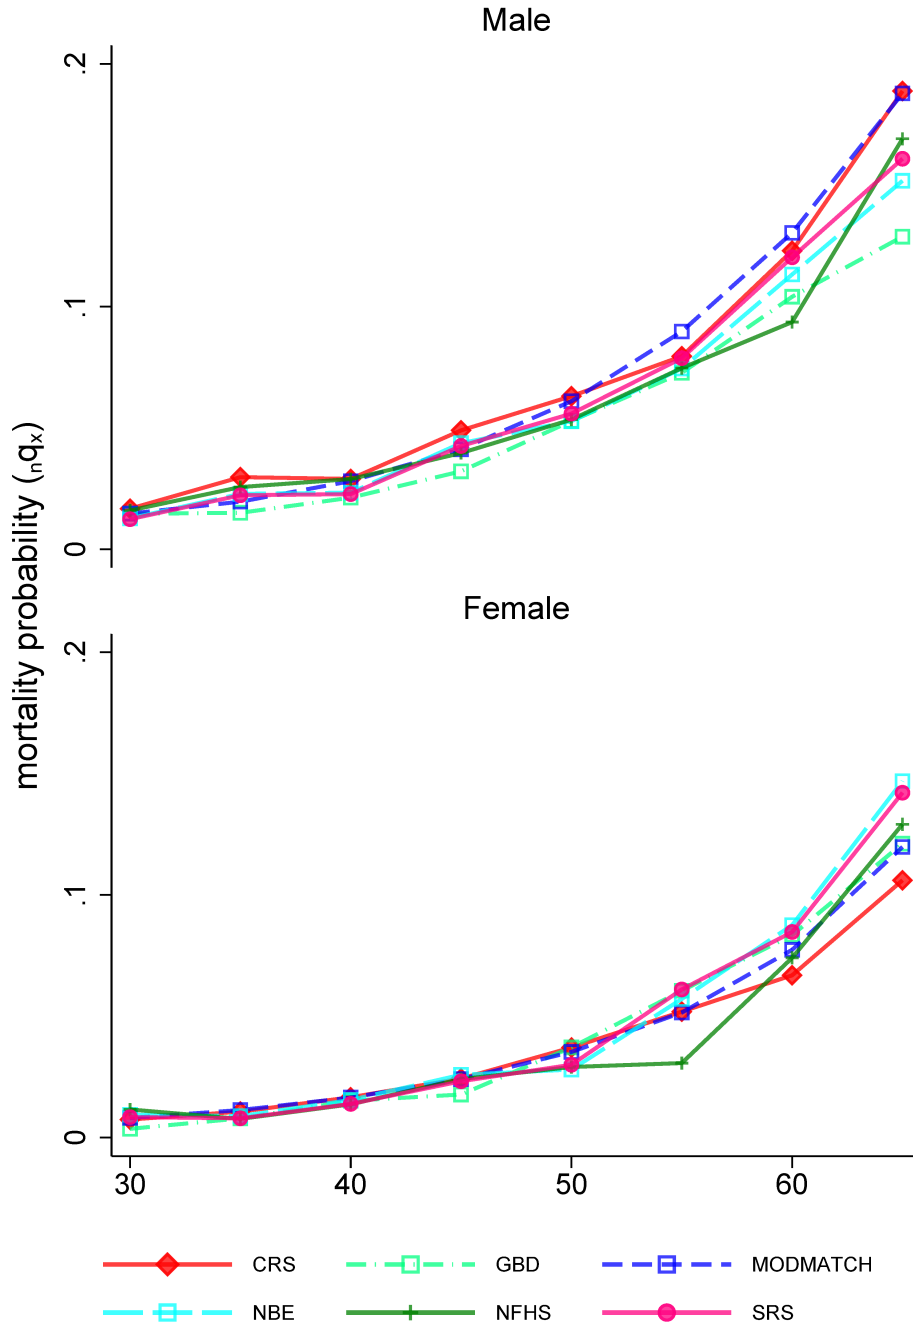

**Appendix 3B: Mortality probabilities by place, source, and sex**

**Adult mortality probability in Assam**

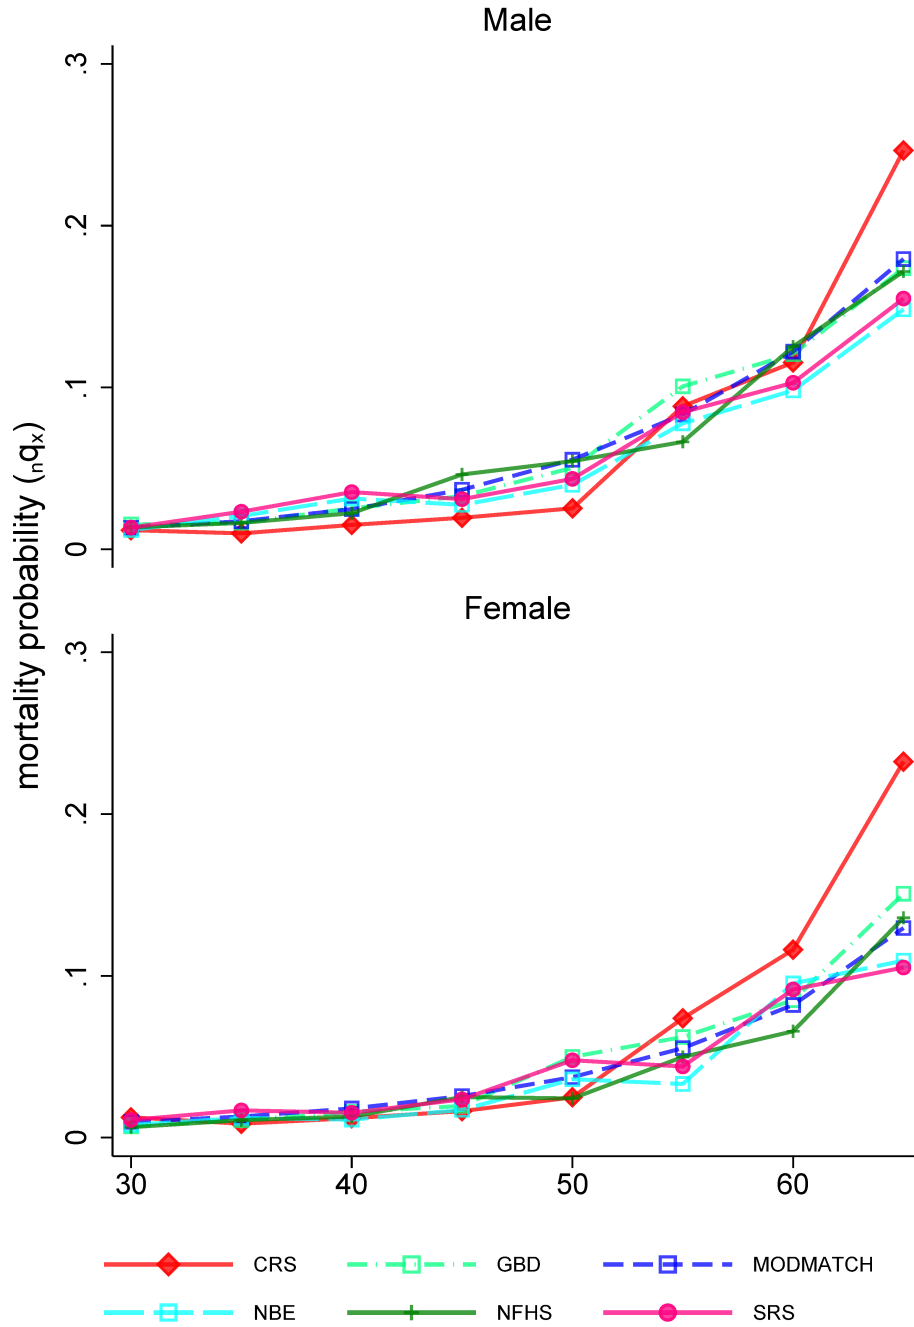

Appendix 3C: Mortality rates by place, source, and sex

Adult mortality probability in Bihar

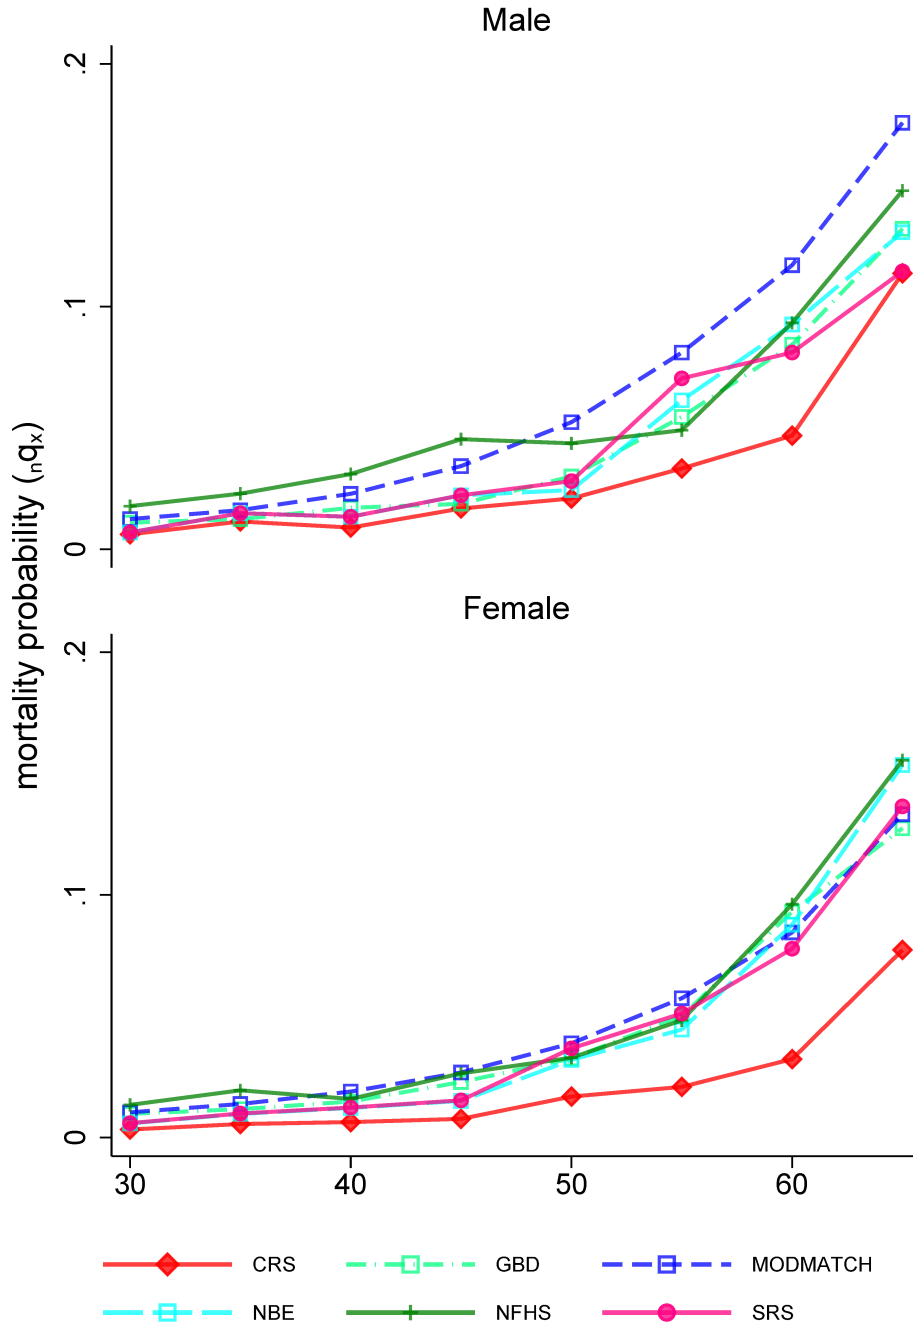

Appendix 3D: Mortality probabilities by place, source, and sex

Adult mortality probability in Chhattisgarh

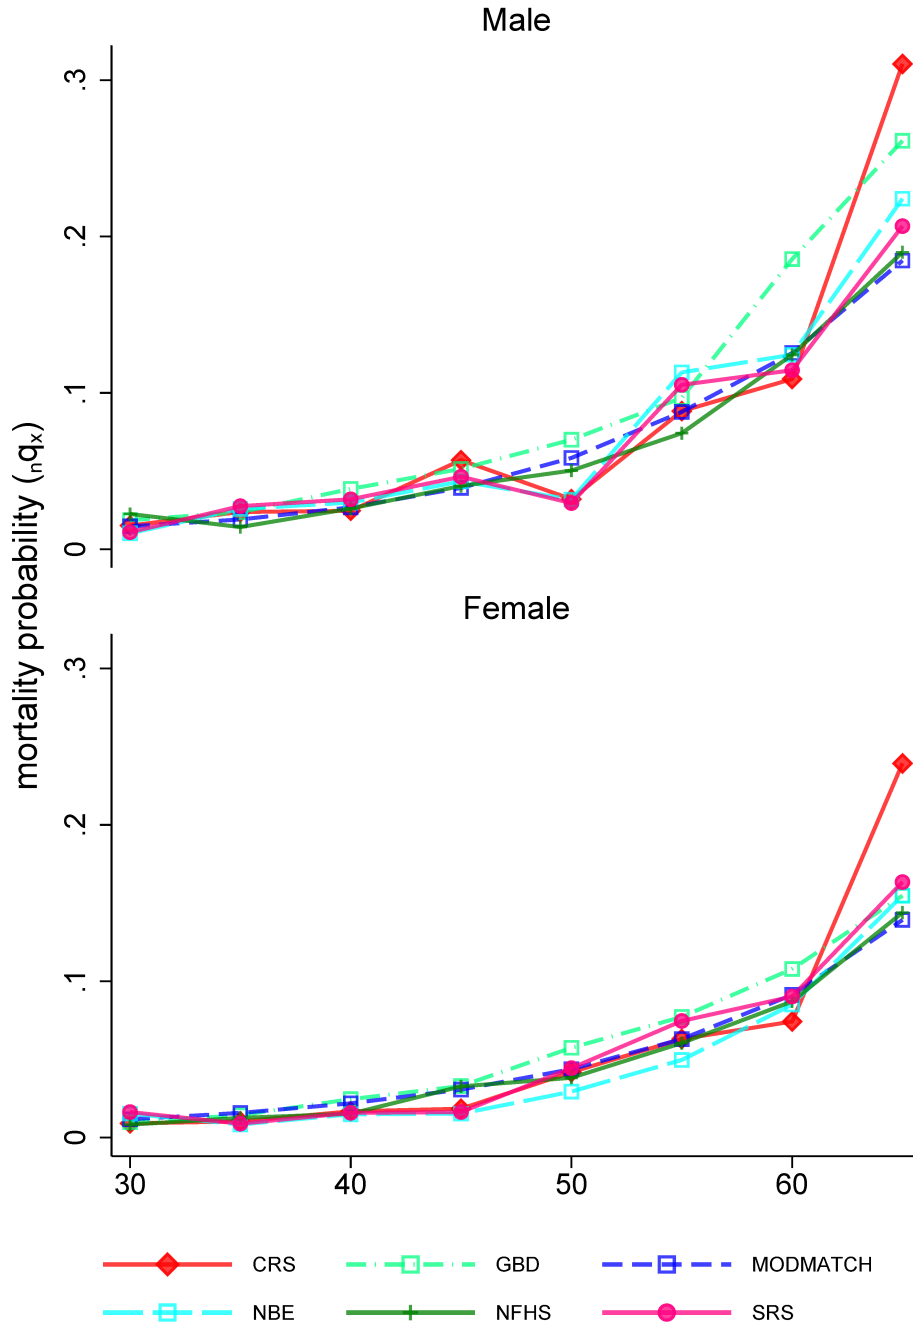

**Appendix 3E: Mortality probabilities by place, source, and sex**

**Adult mortality probability in Gujarat**

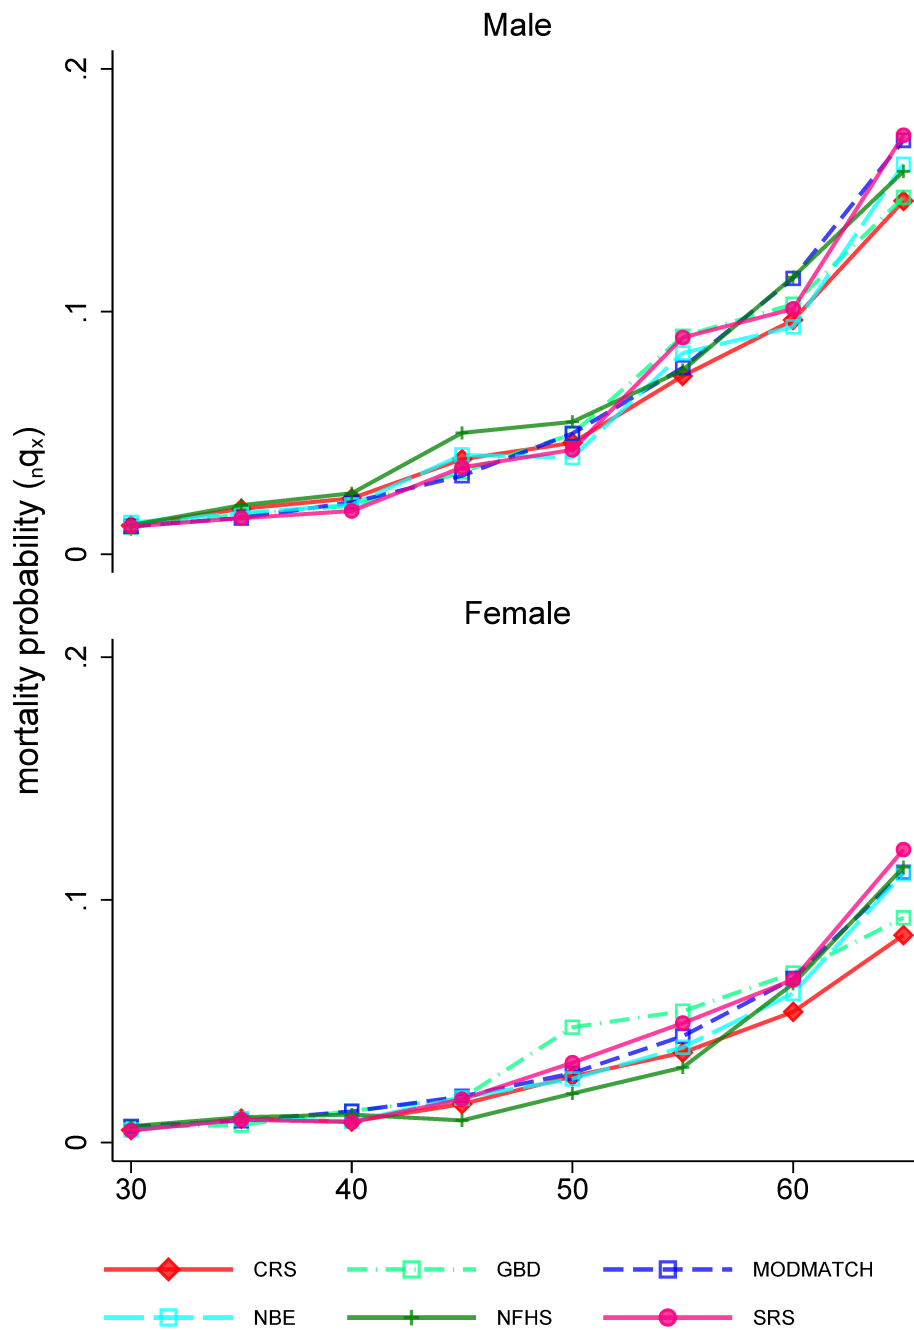

**Appendix 3F: Mortality probabilities by place, source, and sex**

**Adult mortality probability in Haryana**

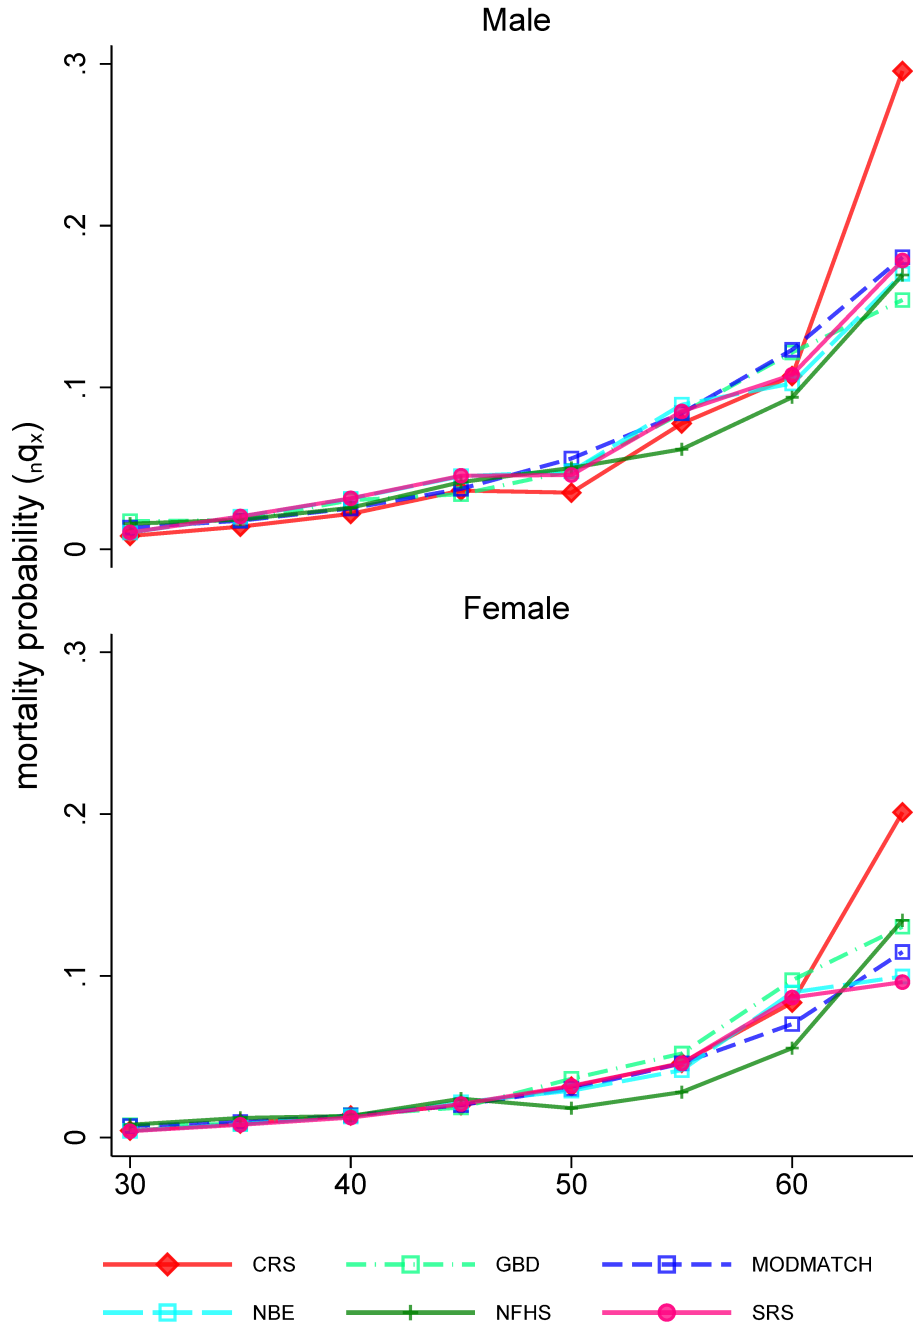

**Appendix 3G: Mortality rates by place, source, and sex**

**Adult mortality probability in Himachal Pradesh**

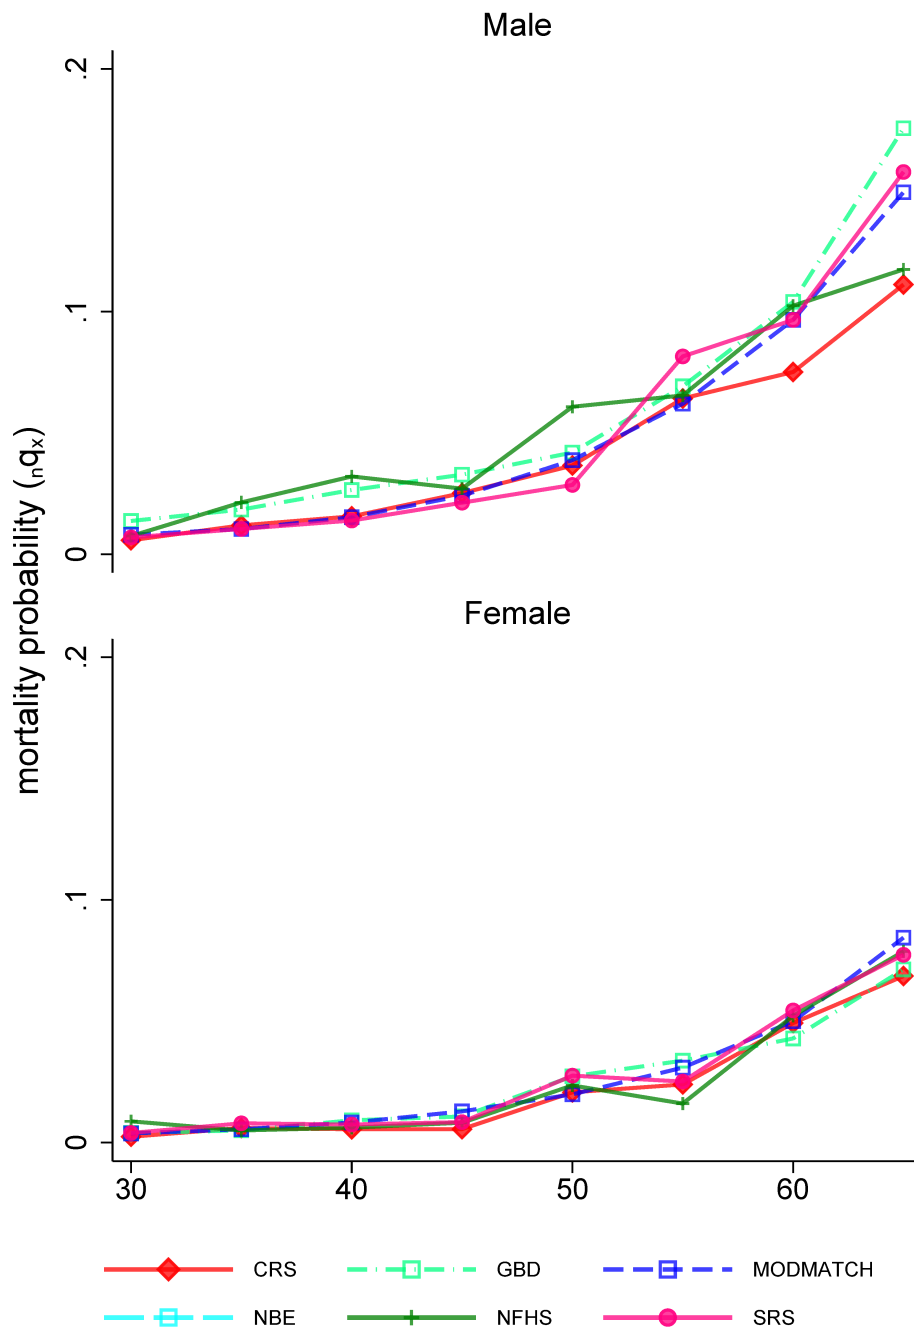



### Appendix 3H: Mortality probabilities by place, source, and sex

#### Adult mortality probability in Jammu and Kashmir

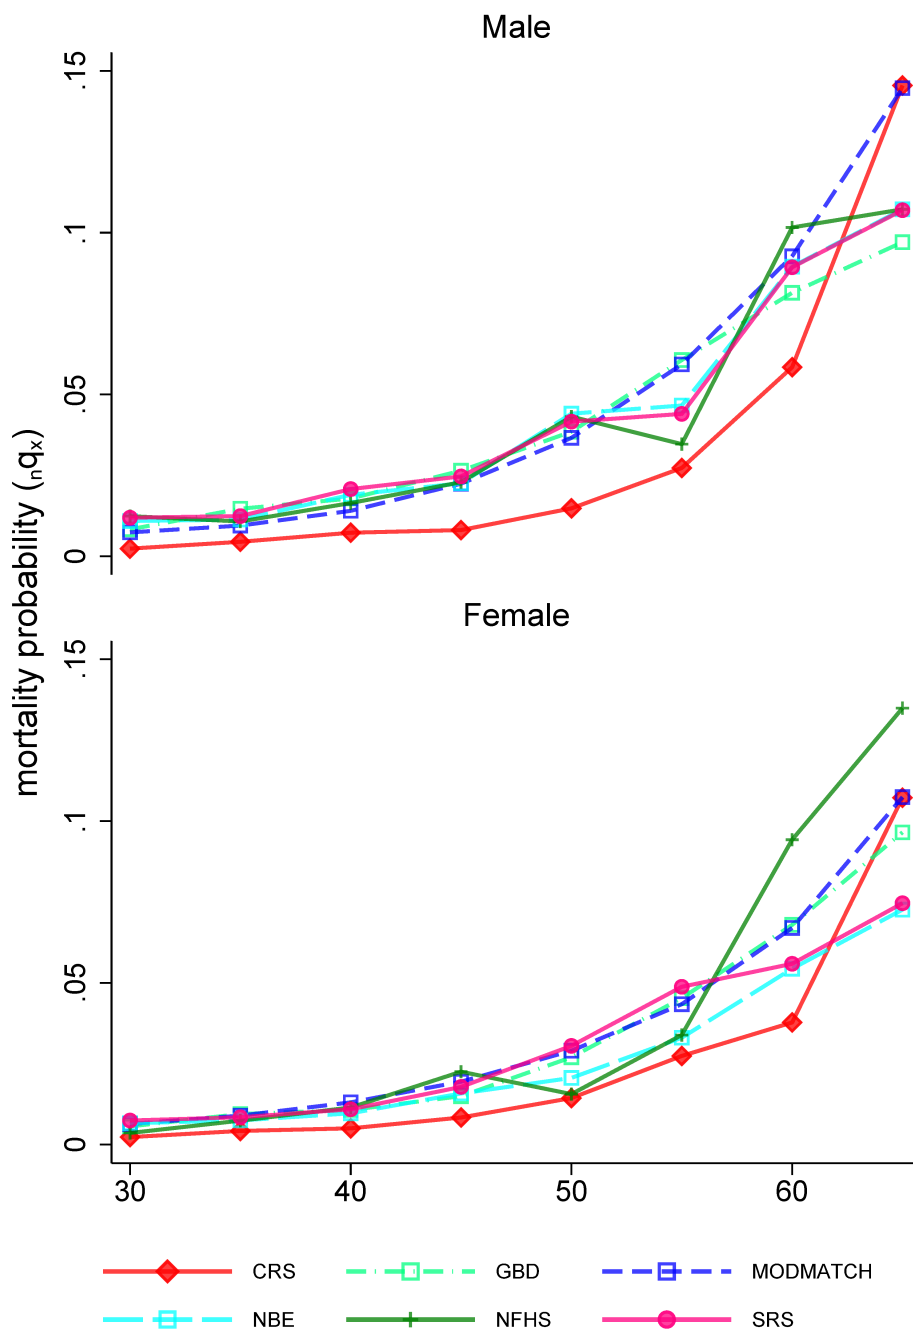

Appendix 3I: Mortality rates by place, source, and sex

Adult mortality probability in Jharkhand

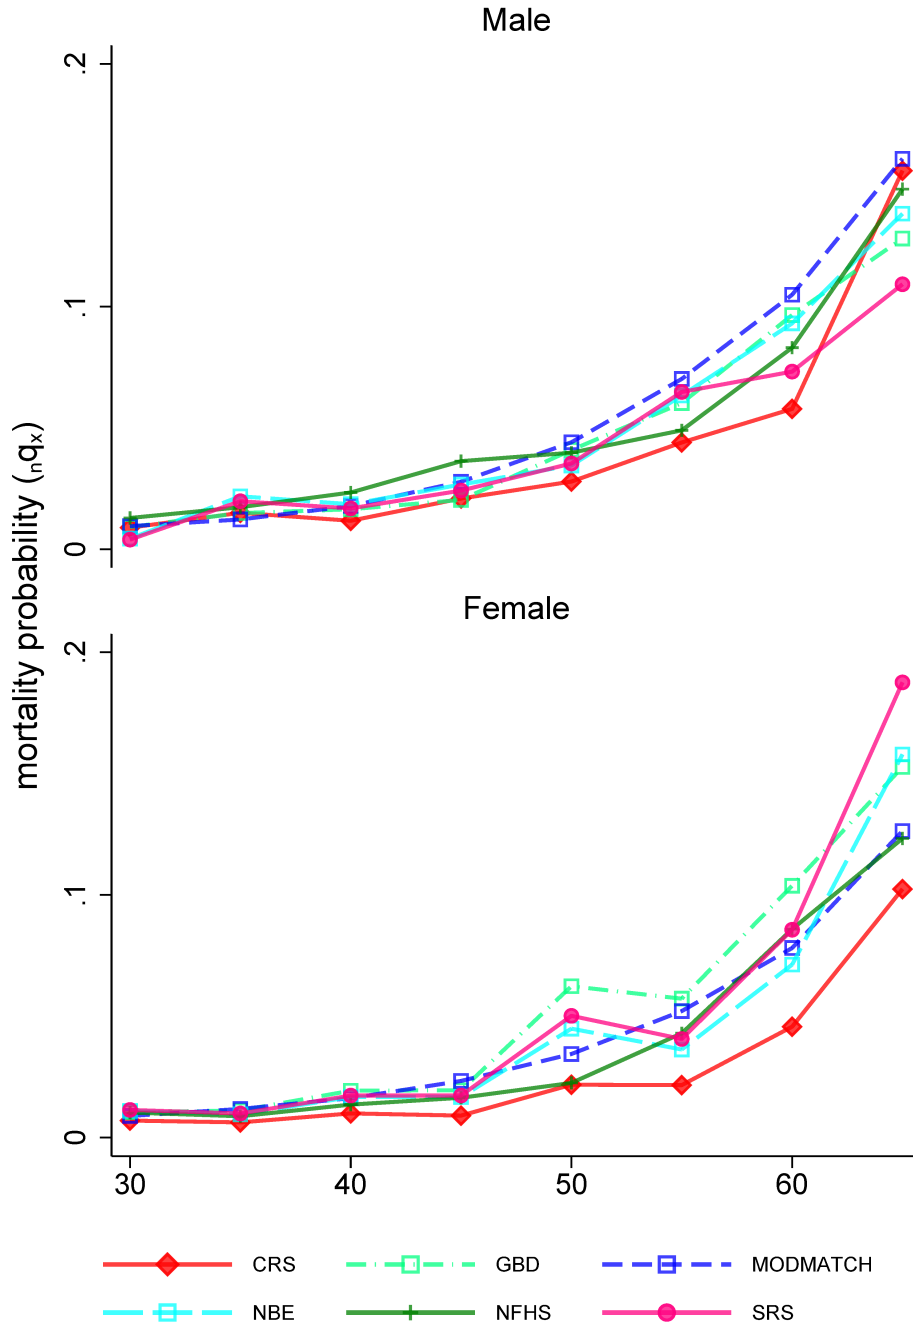

**Appendix 3J: Mortality probabilities by place, source, and sex**

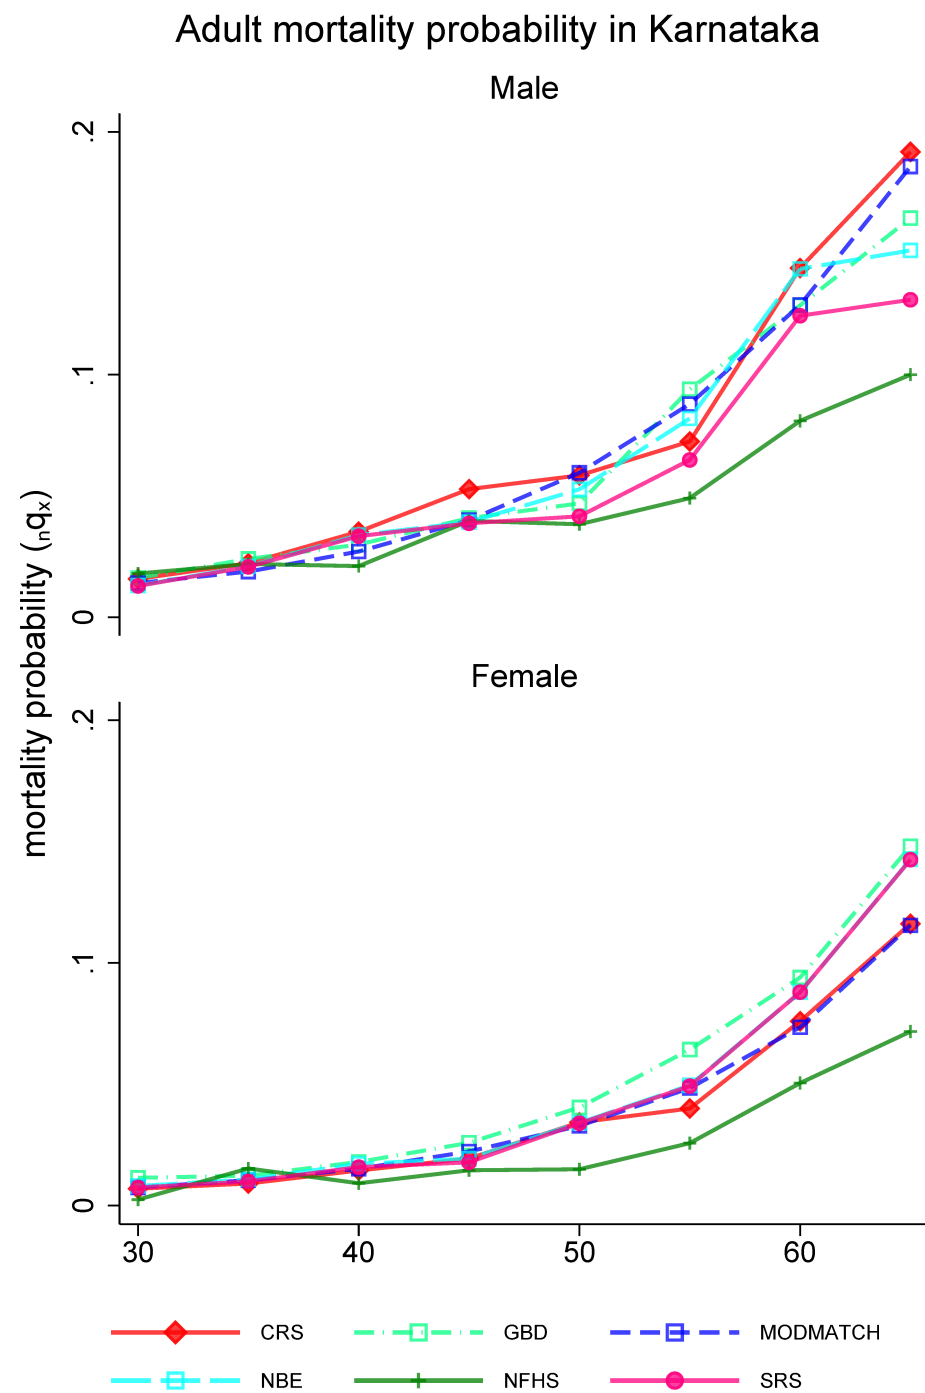

Appendix 3K: Mortality rates by place, source, and sex

Adult mortality probability in Kerala

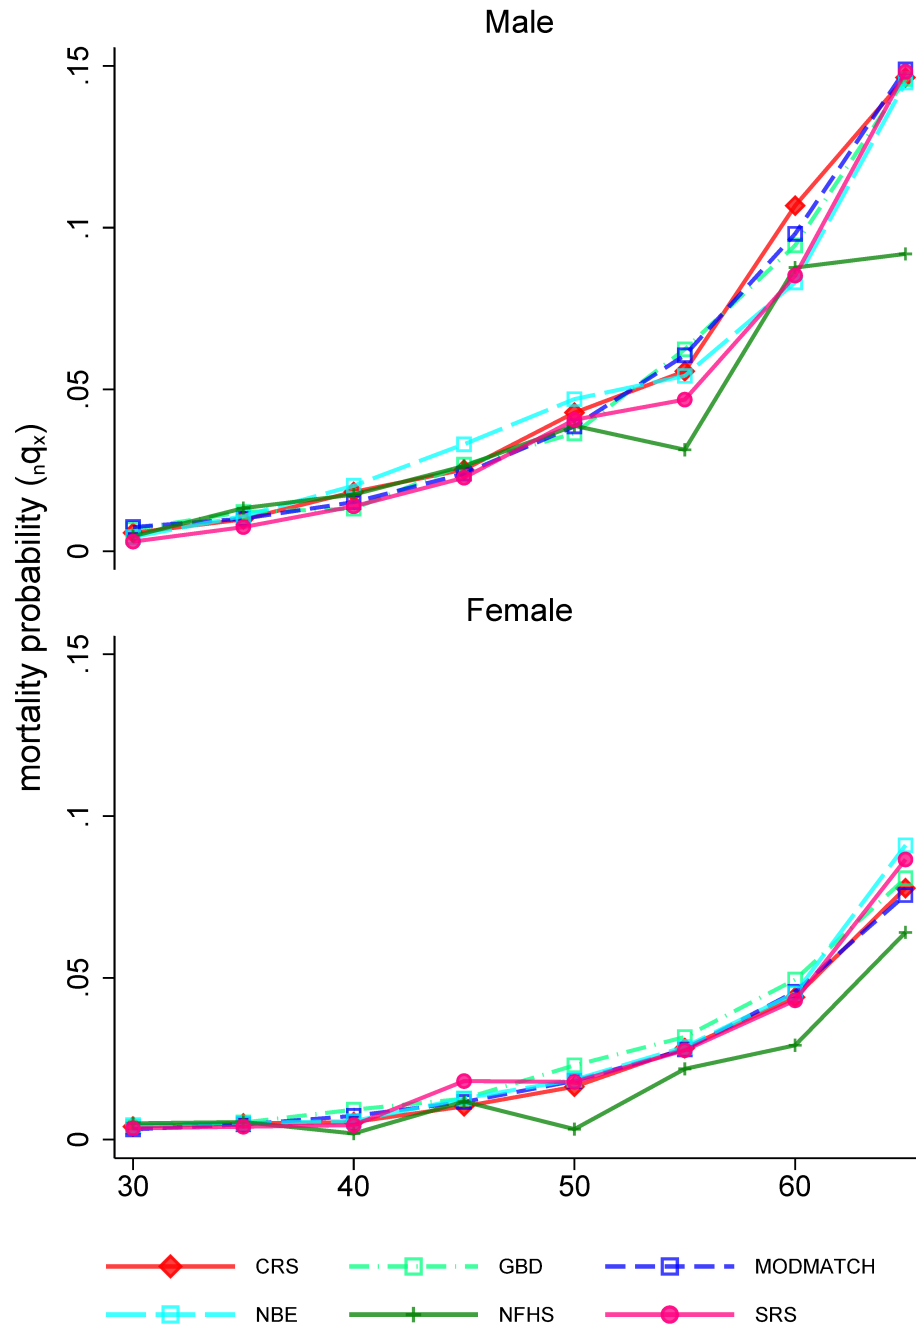

**Appendix 3L: Mortality probabilities by place, source, and sex**

**Adult mortality probability in Madhya Pradesh**

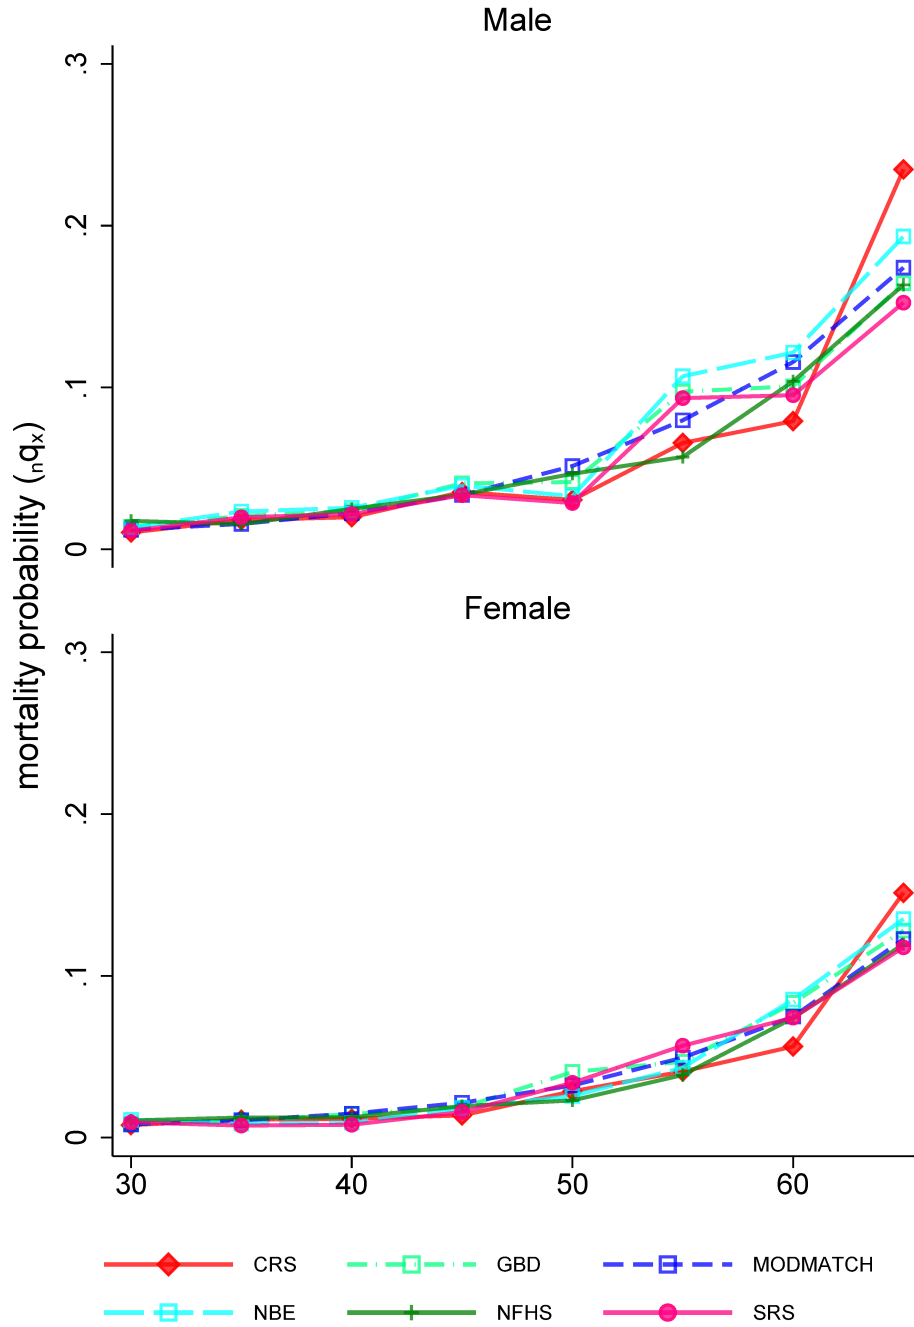

Appendix 3M: Mortality rates by place, source, and sex

Adult mortality risk in Maharashtra

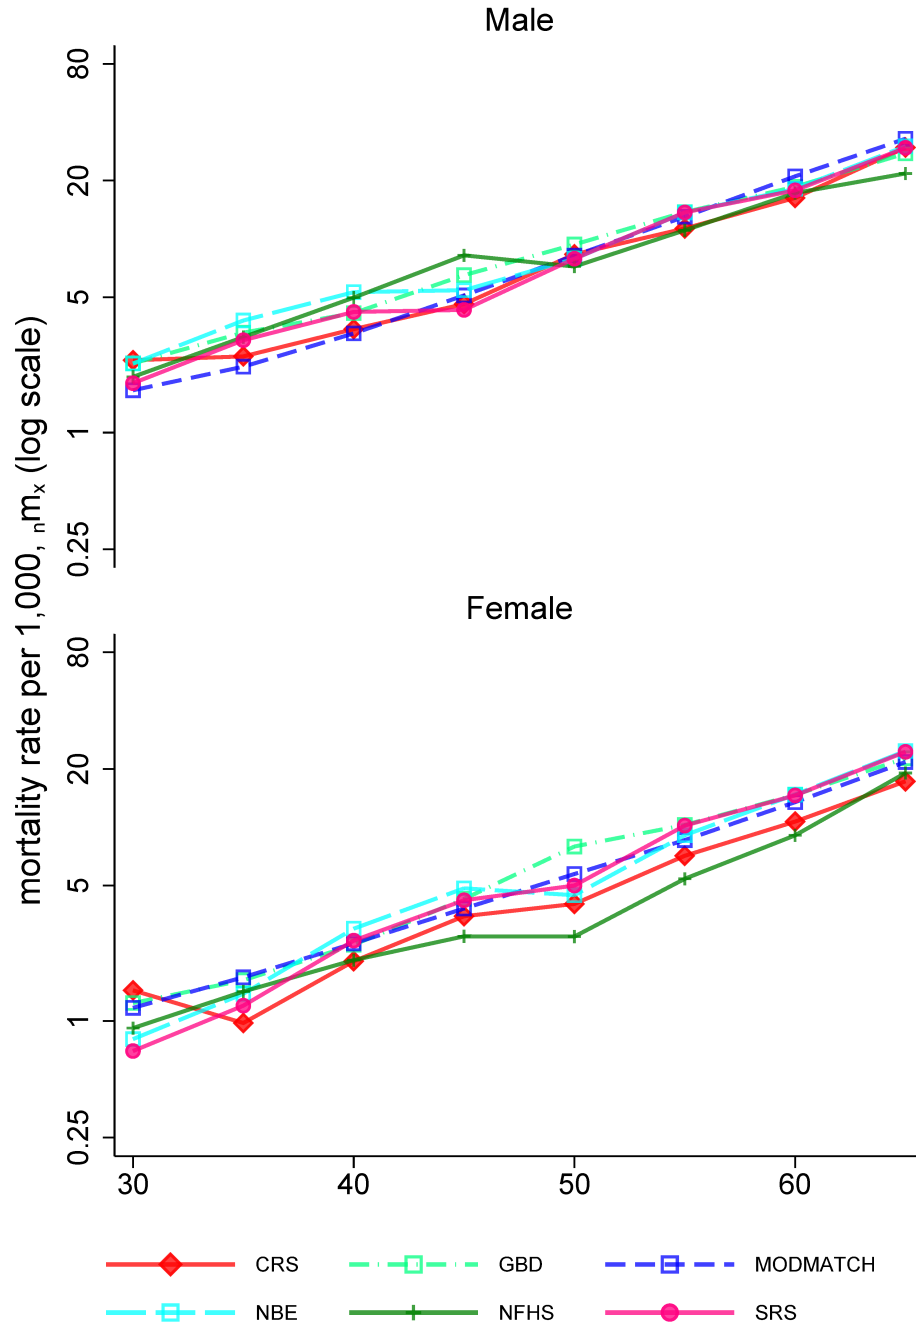

Appendix 3N: Mortality probabilities by place, source, and sex

Adult mortality probability in Odisha

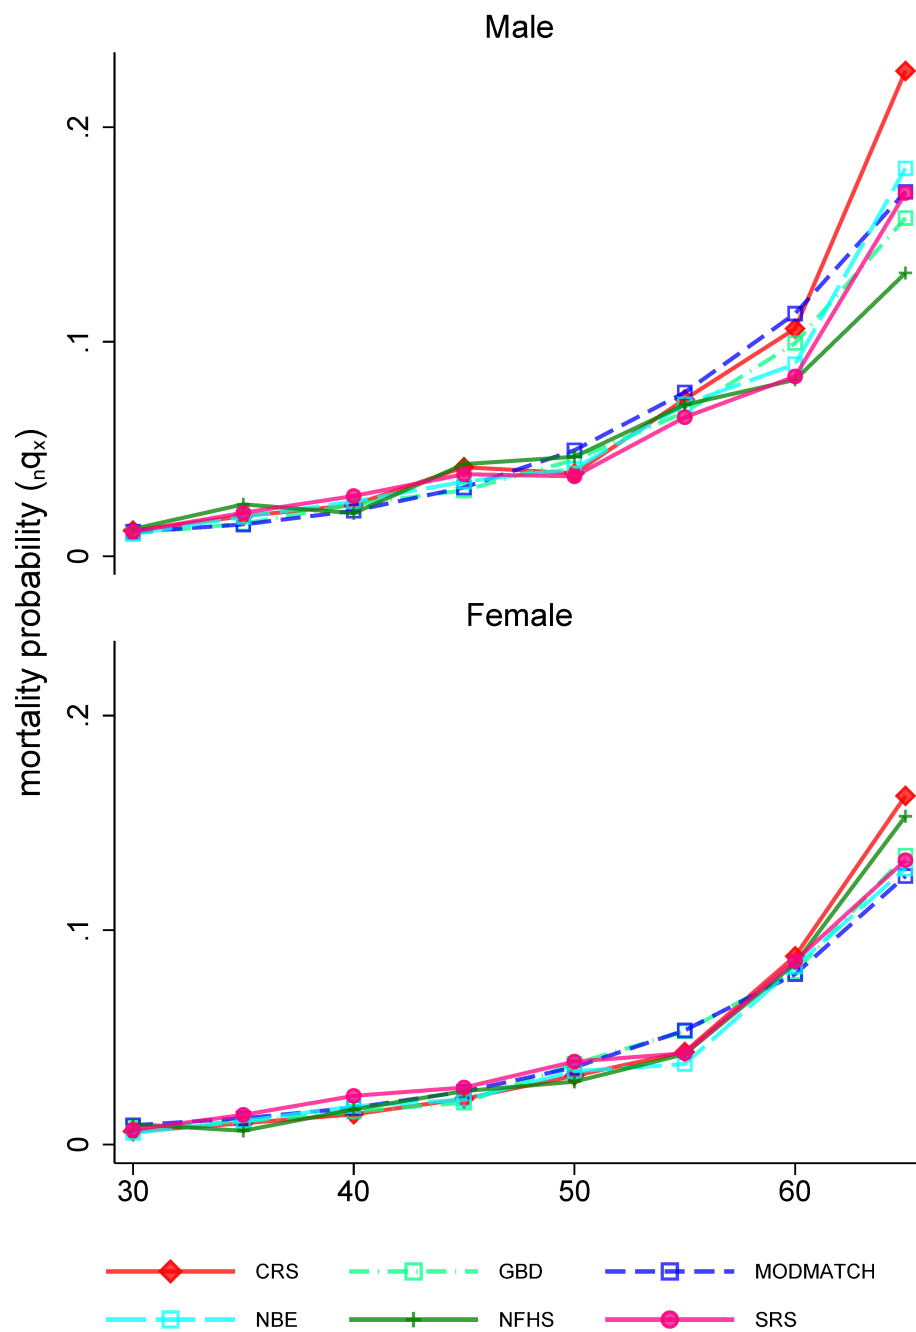

Appendix 3O: Mortality probabilities by place, source, and sex

Adult mortality risk in Punjab

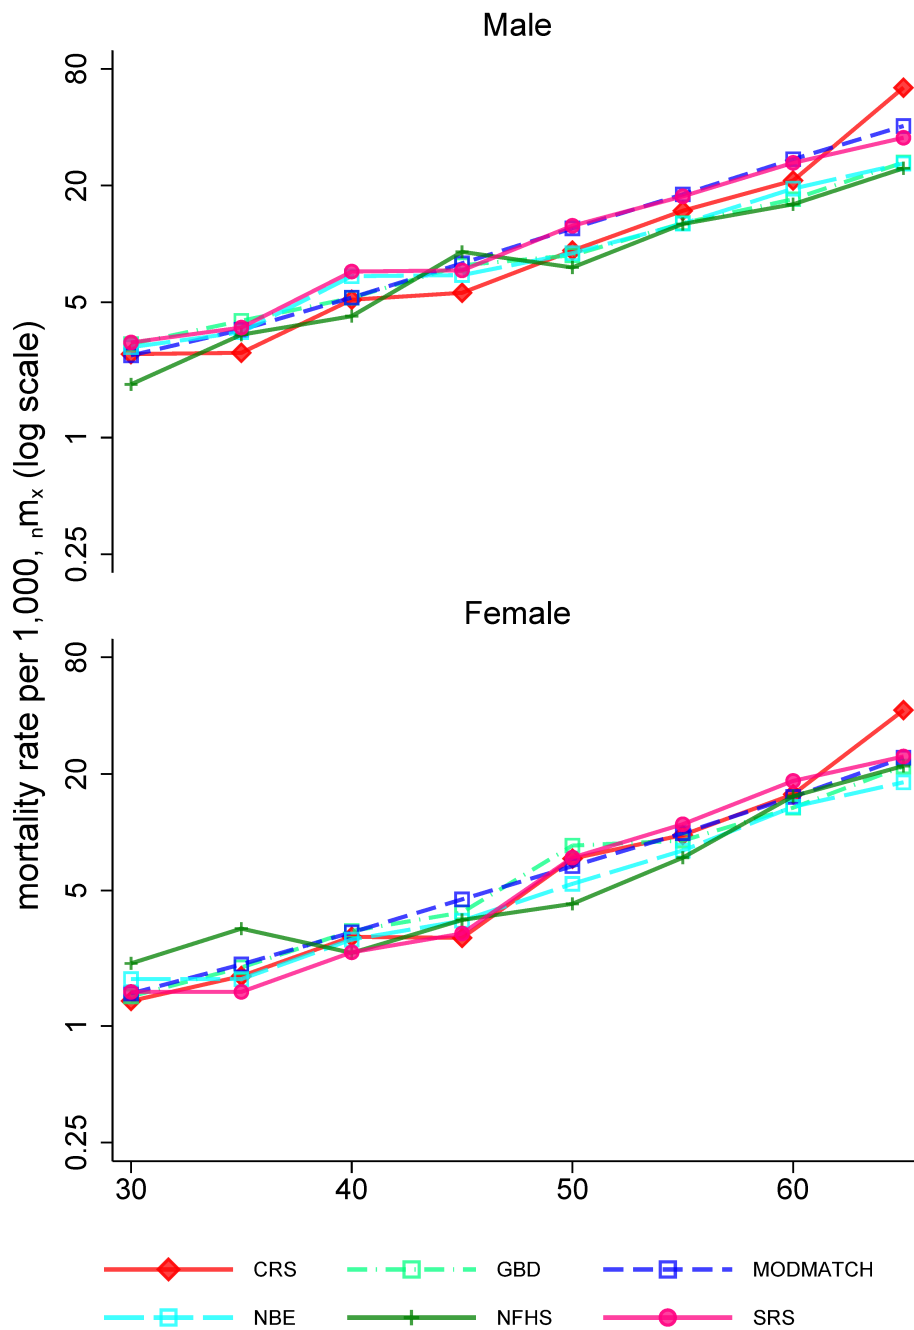



**Appendix 3P: Mortality probabilities by place, source, and sex**

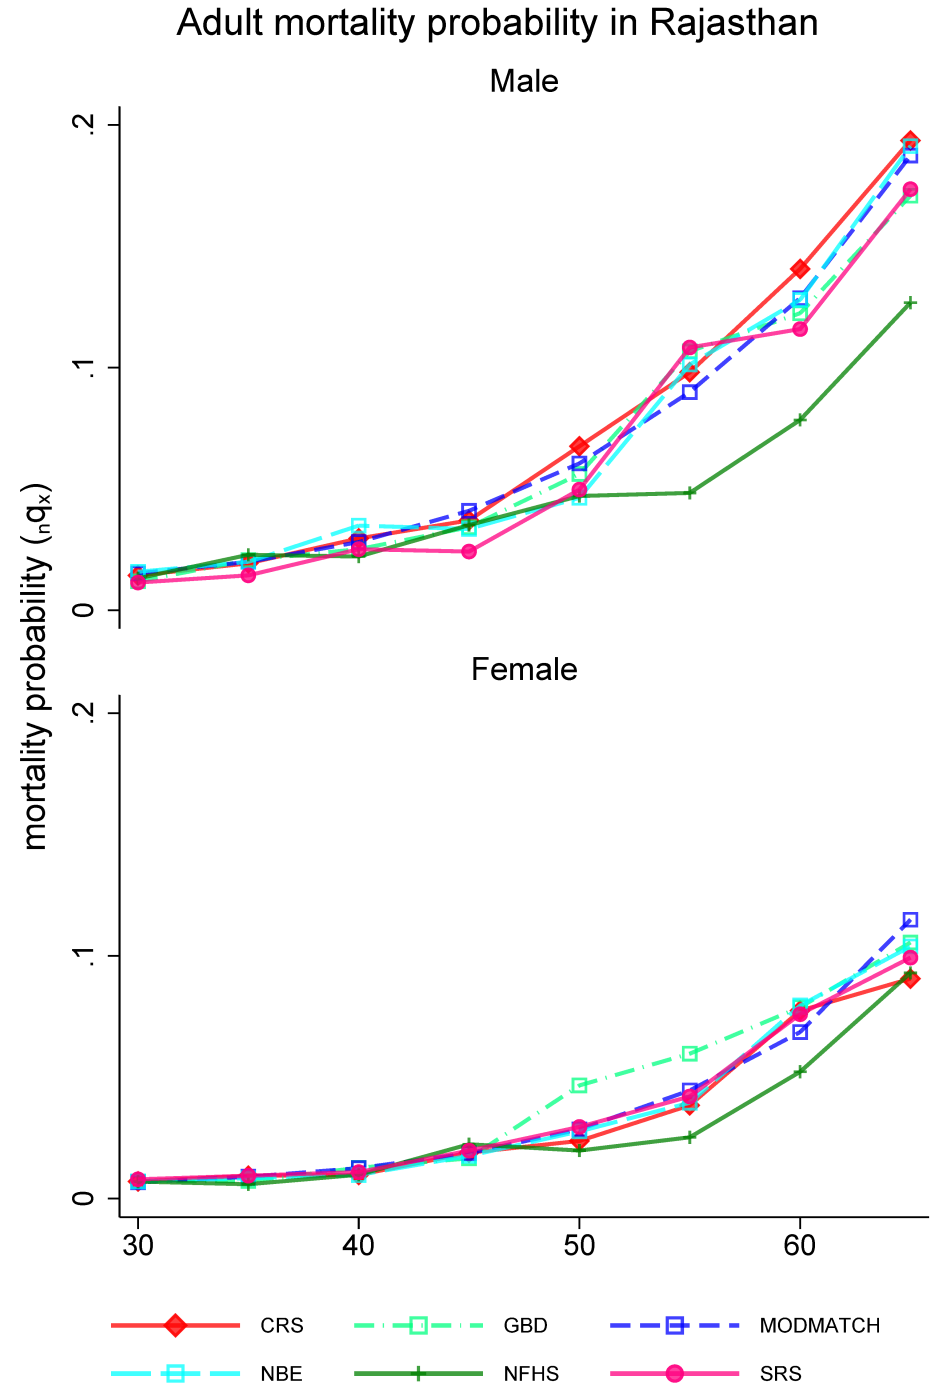

Appendix 3Q: Mortality probabilities by place, source, and sex

Adult mortality probability in Tamil Nadu

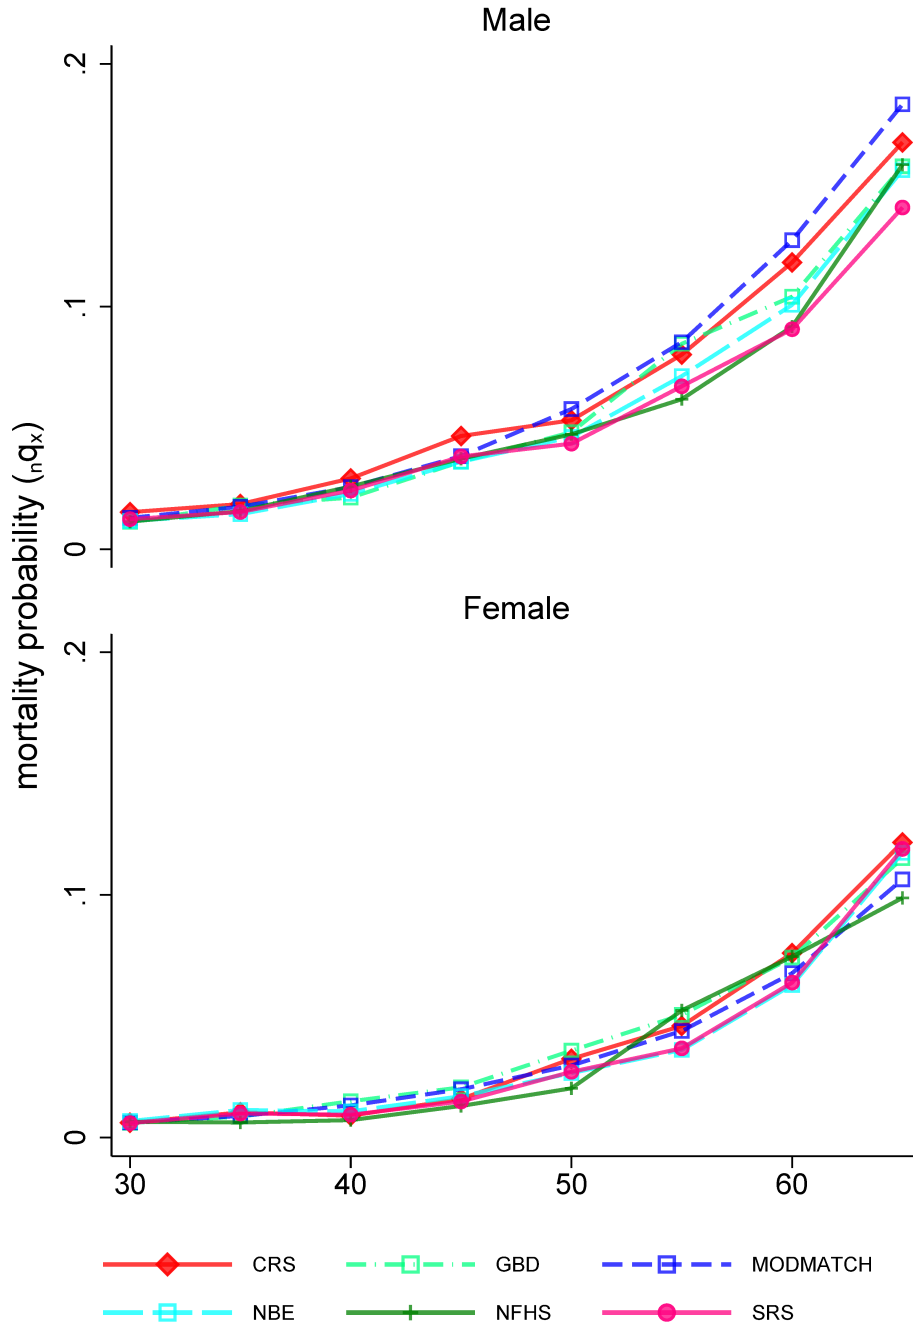

**Appendix 3R: Mortality probabilities by place, source, and sex**

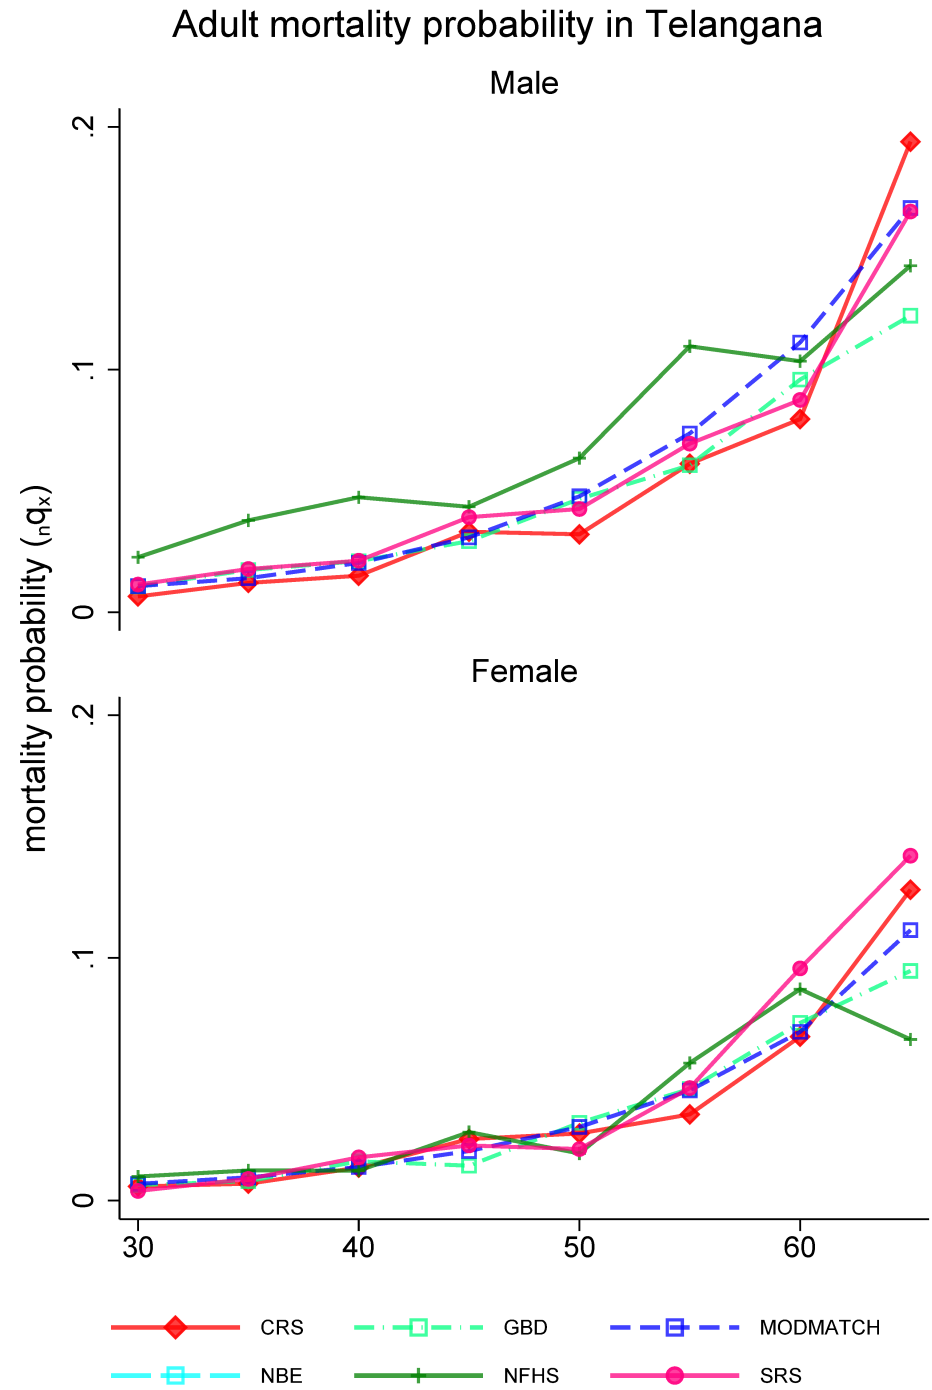

**Appendix 3S: Mortality probabilities by place, source, and sex**

**Adult mortality probability in Uttar Pradesh**

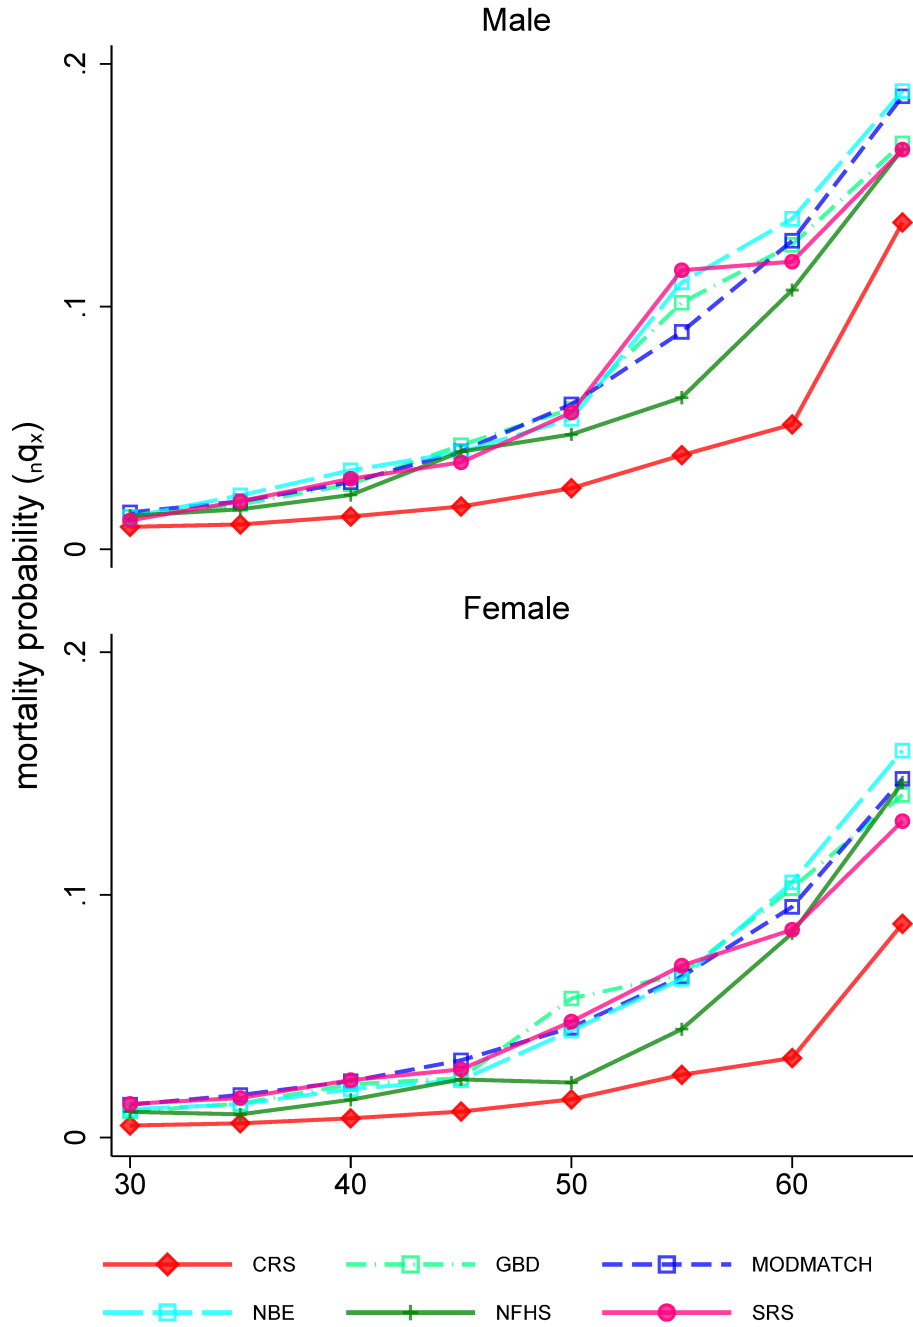

Appendix 3T: Mortality probabilities by place, source, and sex

Adult mortality probability in Uttarakhand

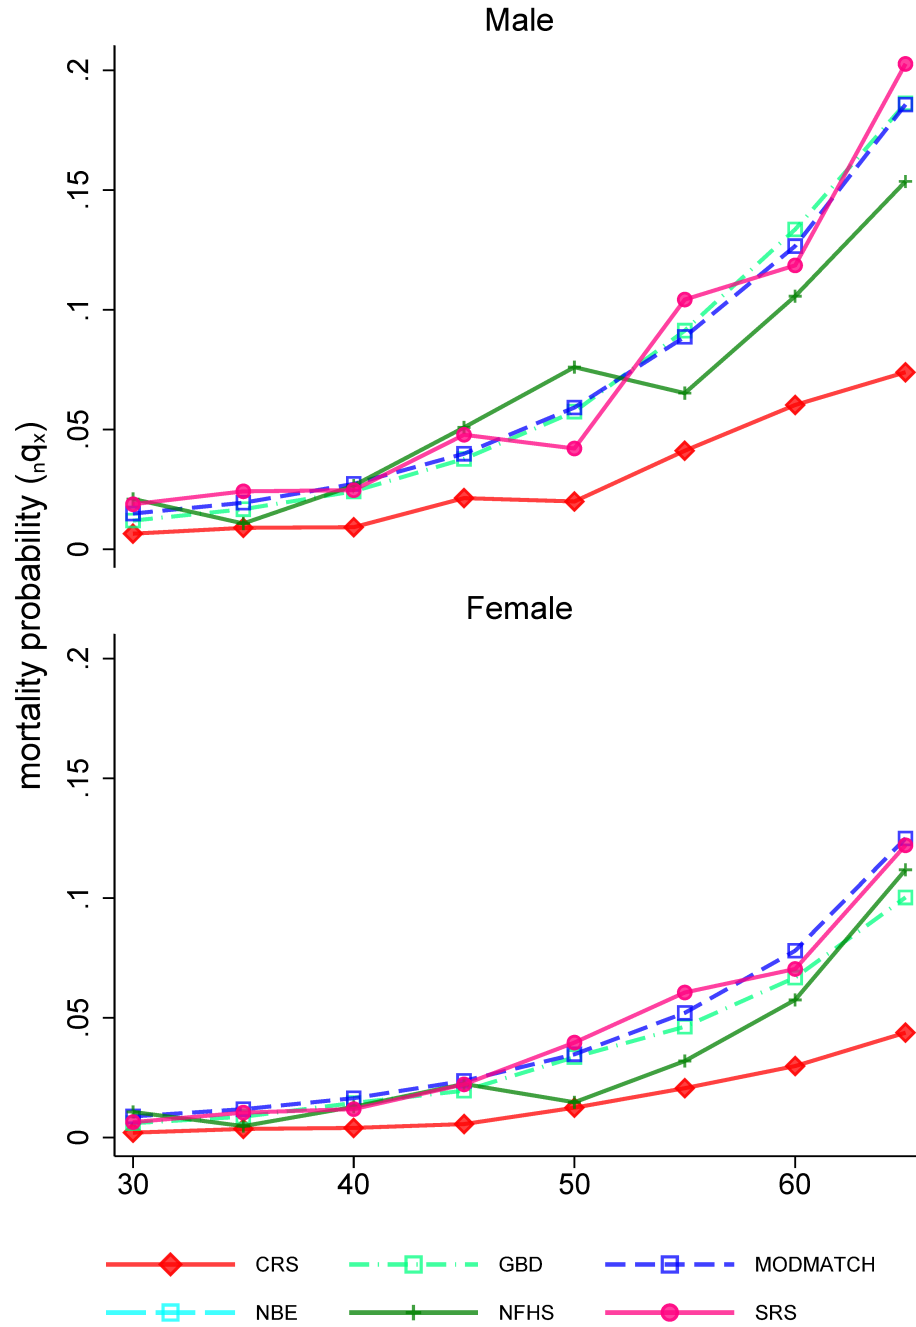

Appendix 3U: Mortality probabilities by place, source, and sex

Adult mortality probability in West Bengal

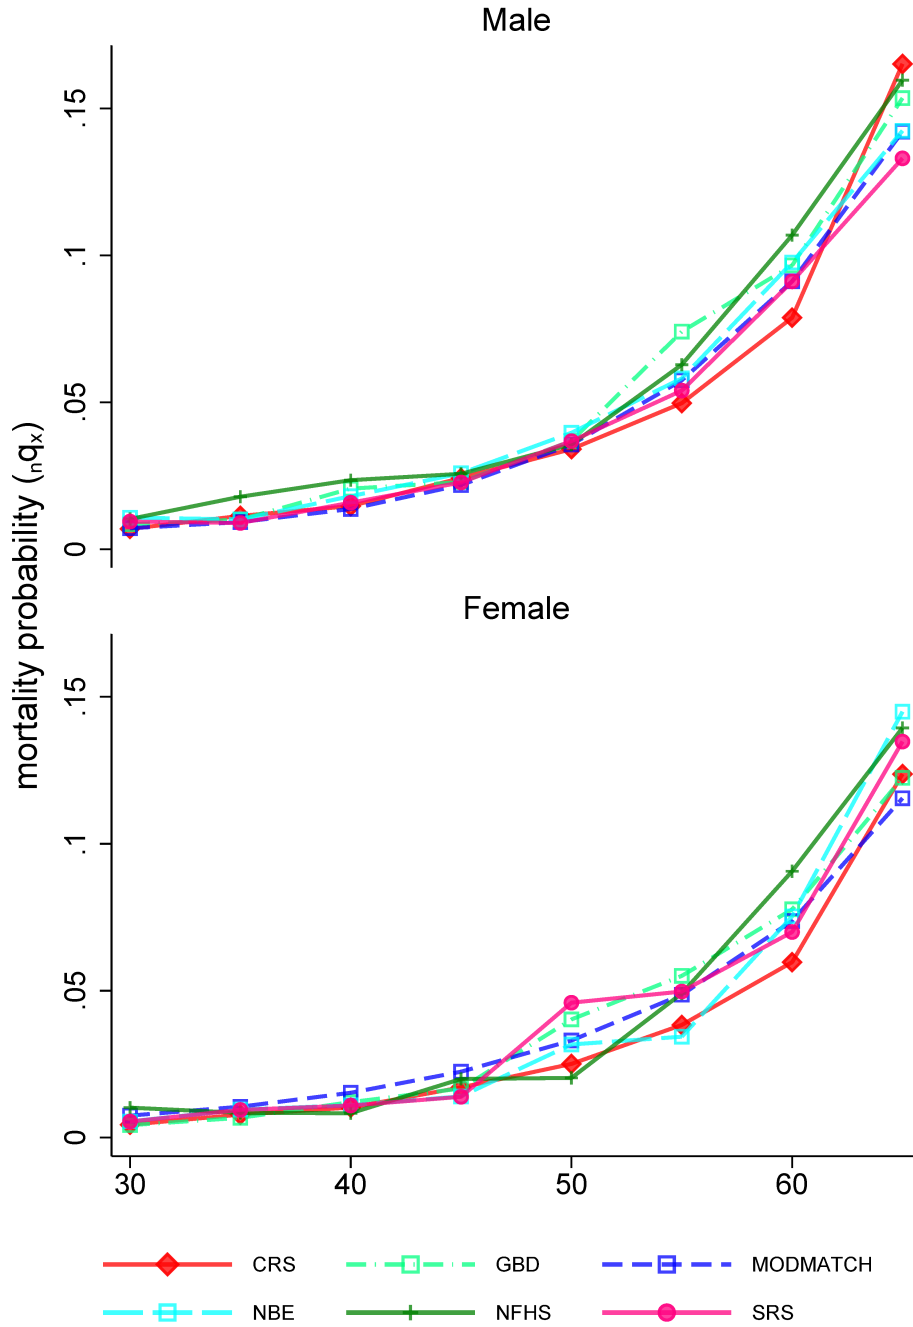

Appendix 3V: Mortality probabilities by place, source, and sex

Adult mortality probability in India

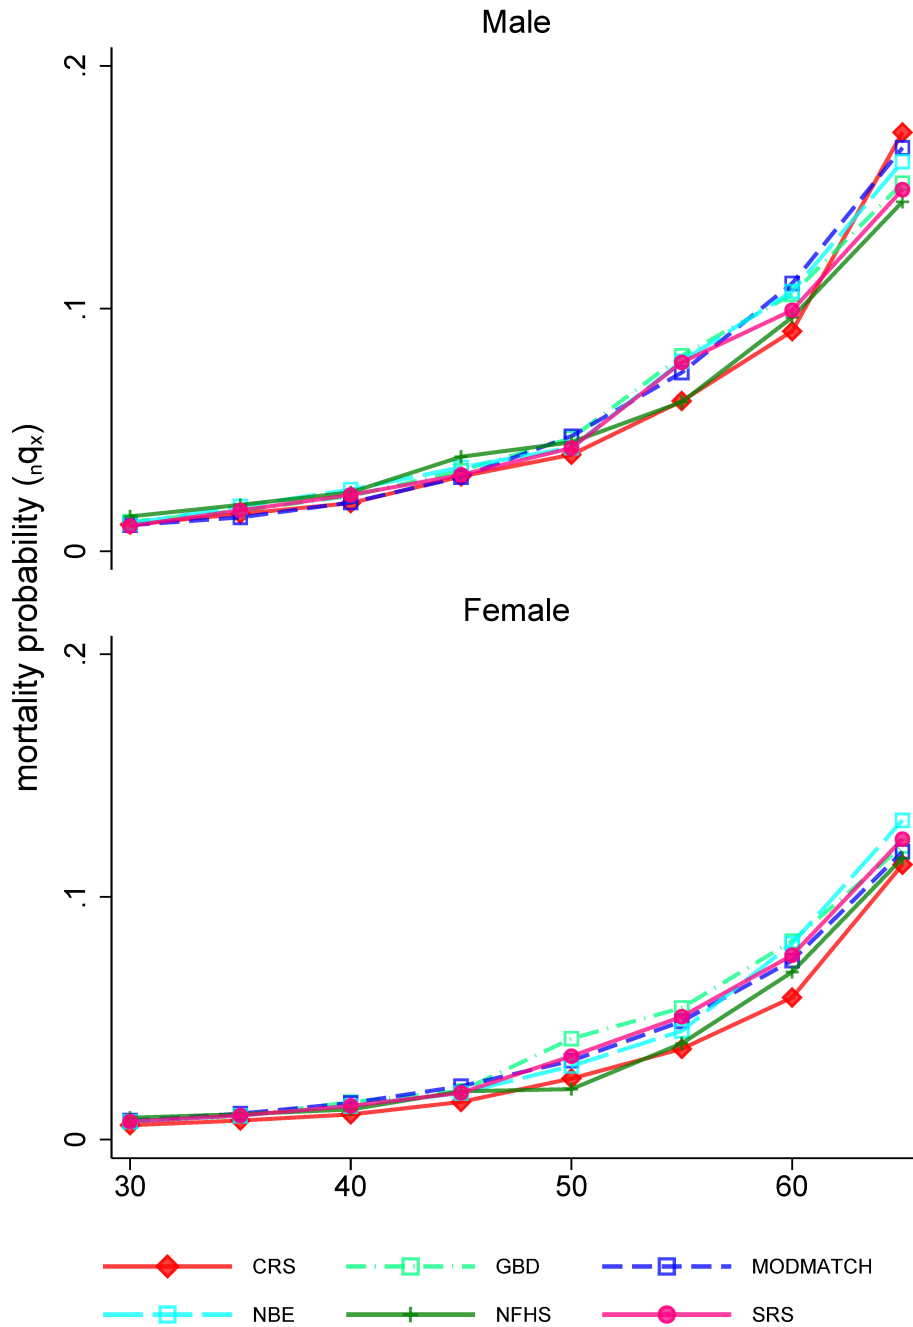

Supplement: bmjgh-2020-004451supp003.pdf [file bmjgh-2020-004451supp003.pdf]
