# Supplementary material for: Premature adult mortality in India: what is the size of the matter?
Source: PubMed Central journal article supplement — BMJ Glob Health. 2021 Jun 16;6(6):e004451. doi: 10.1136/bmjgh-2020-004451 (PMC8211056; doi:10.1136/bmjgh-2020-004451), 2021-06-16
Supplement: bmjgh-2020-004451supp002.pdf [file bmjgh-2020-004451supp002.pdf]

## APPENDIX 2: Uncertainty analysis of life table output measures from different data sources by sex for India and States, 2017

Method: We used a bootstrap method to calculate standard errors and 95% uncertainty Intervals for each summary life table estimate from each source, following Andreev and Shkolonikov 2010 (Reference 27 in manuscript). We used a uniform population distribution across ages, and we compiled 100 bootstrap estimates of age-specific mortality rates. These mortality rates were then used to construct life expectancy estimates. The 95% CIs reported here account for the underlying stochastic error in life table estimation from age-specific mortality rates.

## UNCERTAINTY ESTIMATES

| location_code     | Sex | Indicator | CRS   | 95% UI           | GBD   | 95% UI           | Modmatch | 95% UI           |
|-------------------|-----|-----------|-------|------------------|-------|------------------|----------|------------------|
| Andhra Pradesh    | F   | 40q30     | 0.274 | [0.25779-0.2896] | 0.291 | [0.27192-0.3099] | 0.286    | [0.27021-0.3022] |
| Assam             | F   | 40q30     | 0.407 | [0.38844-0.4256] | 0.316 | [0.29754-0.3354] | 0.297    | [0.28051-0.3135] |
| Bihar             | F   | 40q30     | 0.158 | [0.14291-0.1723] | 0.289 | [0.27184-0.3064] | 0.304    | [0.28720-0.3211] |
| Chhattisgarh      | F   | 40q30     | 0.384 | [0.36713-0.4005] | 0.371 | [0.35332-0.3889] | 0.327    | [0.30911-0.3454] |
| Gujarat           | F   | 40q30     | 0.214 | [0.19881-0.2287] | 0.260 | [0.24253-0.2768] | 0.267    | [0.25014-0.2834] |
| Haryana           | F   | 40q30     | 0.347 | [0.32658-0.3668] | 0.300 | [0.28179-0.3175] | 0.259    | [0.24496-0.2732] |
| Himachal Pradesh  | F   | 40q30     | 0.166 | [0.15228-0.1802] | 0.181 | [0.16597-0.1957] | 0.192    | [0.17788-0.2069] |
| INDIA             | F   | 40q30     | 0.241 | [0.22456-0.2576] | 0.287 | [0.26980-0.3035] | 0.272    | [0.25603-0.2879] |
| Jammu and Kashmir | F   | 40q30     | 0.188 | [0.17249-0.2035] | 0.236 | [0.21778-0.2544] | 0.251    | [0.23475-0.2678] |
| Jharkhand         | F   | 40q30     | 0.202 | [0.18632-0.2177] | 0.346 | [0.32776-0.3648] | 0.282    | [0.26454-0.3004] |
| Karnataka         | F   | 40q30     | 0.271 | [0.25339-0.2884] | 0.334 | [0.31573-0.3518] | 0.273    | [0.25661-0.2897] |
| Kerala            | F   | 40q30     | 0.175 | [0.15878-0.1920] | 0.195 | [0.17890-0.2108] | 0.177    | [0.16132-0.1925] |
| Madhya Pradesh    | F   | 40q30     | 0.277 | [0.26055-0.2931] | 0.283 | [0.26465-0.3018] | 0.271    | [0.25613-0.2857] |
| Maharashtra       | F   | 40q30     | 0.204 | [0.18850-0.2192] | 0.268 | [0.25130-0.2847] | 0.246    | [0.22854-0.2627] |
| Odisha            | F   | 40q30     | 0.315 | [0.29673-0.3332] | 0.291 | [0.27448-0.3081] | 0.291    | [0.27250-0.3087] |
| Punjab            | F   | 40q30     | 0.336 | [0.31554-0.3572] | 0.258 | [0.24367-0.2717] | 0.273    | [0.25676-0.2887] |

**UNCERTAINTY ESTIMATES**

| <b>location_code</b> | <b>Sex</b> | <b>Indicator</b> | <b>CRS</b> | <b>95% UI</b>    | <b>GBD</b> | <b>95% UI</b>    | <b>Modmatch</b> | <b>95% UI</b>    |
|----------------------|------------|------------------|------------|------------------|------------|------------------|-----------------|------------------|
| Rajasthan            | F          | 40q30            | 0.242      | [0.22332-0.2616] | 0.274      | [0.25745-0.2904] | 0.251           | [0.23282-0.2682] |
| Tamil Nadu           | F          | 40q30            | 0.274      | [0.25469-0.2926] | 0.277      | [0.26004-0.2944] | 0.254           | [0.23557-0.2732] |
| Telangana            | F          | 40q30            | 0.268      | [0.25047-0.2854] | 0.250      | [0.23297-0.2667] | 0.259           | [0.24221-0.2766] |
| Uttar Pradesh        | F          | 40q30            | 0.176      | [0.16049-0.1914] | 0.335      | [0.31540-0.3546] | 0.331           | [0.31534-0.3474] |
| Uttarakhand          | F          | 40q30            | 0.115      | [0.10282-0.1280] | 0.252      | [0.23406-0.2706] | 0.284           | [0.26390-0.3043] |
| West Bengal          | F          | 40q30            | 0.252      | [0.23444-0.2701] | 0.281      | [0.26189-0.3008] | 0.274           | [0.25831-0.2898] |
| Andhra Pradesh       | F          | 45q15            | 0.151      | [0.13610-0.1654] | 0.139      | [0.12645-0.1520] | 0.148           | [0.13256-0.1628] |
| Assam                | F          | 45q15            | 0.152      | [0.13789-0.1667] | 0.160      | [0.14457-0.1759] | 0.157           | [0.14138-0.1730] |
| Bihar                | F          | 45q15            | 0.069      | [0.05721-0.0800] | 0.143      | [0.12681-0.1582] | 0.163           | [0.14708-0.1798] |
| Chhattisgarh         | F          | 45q15            | 0.167      | [0.15102-0.1830] | 0.202      | [0.18456-0.2187] | 0.183           | [0.16619-0.2006] |
| Gujarat              | F          | 45q15            | 0.111      | [0.09859-0.1242] | 0.145      | [0.13096-0.1583] | 0.133           | [0.11861-0.1469] |
| Haryana              | F          | 45q15            | 0.130      | [0.11669-0.1442] | 0.137      | [0.12160-0.1519] | 0.126           | [0.11299-0.1400] |
| Himachal Pradesh     | F          | 45q15            | 0.072      | [0.06084-0.0828] | 0.093      | [0.08252-0.1031] | 0.083           | [0.07224-0.0941] |
| INDIA                | F          | 45q15            | 0.109      | [0.09548-0.1221] | 0.147      | [0.13222-0.1620] | 0.137           | [0.12387-0.1498] |
| Jammu and Kashmir    | F          | 45q15            | 0.064      | [0.05334-0.0748] | 0.114      | [0.10193-0.1270] | 0.122           | [0.10784-0.1361] |
| Jharkhand            | F          | 45q15            | 0.082      | [0.07159-0.0930] | 0.174      | [0.15745-0.1898] | 0.145           | [0.12822-0.1610] |
| Karnataka            | F          | 45q15            | 0.130      | [0.11489-0.1449] | 0.176      | [0.16109-0.1900] | 0.138           | [0.12363-0.1522] |
| Kerala               | F          | 45q15            | 0.072      | [0.06187-0.0822] | 0.089      | [0.07900-0.0997] | 0.075           | [0.06485-0.0860] |
| Madhya Pradesh       | F          | 45q15            | 0.122      | [0.10774-0.1370] | 0.143      | [0.13034-0.1561] | 0.135           | [0.12103-0.1483] |
| Maharashtra          | F          | 45q15            | 0.104      | [0.09302-0.1157] | 0.136      | [0.12300-0.1500] | 0.118           | [0.10502-0.1311] |
| Odisha               | F          | 45q15            | 0.134      | [0.11961-0.1479] | 0.145      | [0.13040-0.1601] | 0.152           | [0.13840-0.1652] |
| Punjab               | F          | 45q15            | 0.133      | [0.11896-0.1470] | 0.137      | [0.12461-0.1499] | 0.137           | [0.12555-0.1494] |
| Rajasthan            | F          | 45q15            | 0.113      | [0.09949-0.1264] | 0.142      | [0.12862-0.1563] | 0.118           | [0.10462-0.1317] |

## UNCERTAINTY ESTIMATES

| location_code     | Sex | Indicator | CRS   | 95% UI           | GBD   | 95% UI           | Modmatch | 95% UI           |
|-------------------|-----|-----------|-------|------------------|-------|------------------|----------|------------------|
| Tamil Nadu        | F   | 45q15     | 0.125 | [0.11020-0.1402] | 0.140 | [0.12515-0.1543] | 0.124    | [0.11066-0.1375] |
| Telangana         | F   | 45q15     | 0.122 | [0.10709-0.1363] | 0.124 | [0.11027-0.1386] | 0.128    | [0.11435-0.1410] |
| Uttar Pradesh     | F   | 45q15     | 0.077 | [0.06526-0.0891] | 0.187 | [0.17186-0.2013] | 0.190    | [0.17466-0.2049] |
| Uttarakhand       | F   | 45q15     | 0.052 | [0.04370-0.0606] | 0.127 | [0.11414-0.1401] | 0.146    | [0.13192-0.1607] |
| West Bengal       | F   | 45q15     | 0.105 | [0.09194-0.1181] | 0.134 | [0.11991-0.1482] | 0.139    | [0.12710-0.1500] |
| Andhra Pradesh    | F   | 5q0       | 0.013 | [0.01015-0.0162] | 0.028 | [0.02423-0.0315] | 0.029    | [0.02458-0.0335] |
| Assam             | F   | 5q0       | 0.007 | [0.00449-0.0091] | 0.055 | [0.04958-0.0610] | 0.049    | [0.04362-0.0546] |
| Bihar             | F   | 5q0       | 0.005 | [0.00251-0.0067] | 0.055 | [0.04863-0.0610] | 0.053    | [0.04801-0.0582] |
| Chhattisgarh      | F   | 5q0       | 0.016 | [0.01224-0.0189] | 0.043 | [0.03770-0.0485] | 0.046    | [0.04138-0.0508] |
| Gujarat           | F   | 5q0       | 0.015 | [0.01174-0.0178] | 0.033 | [0.02915-0.0371] | 0.022    | [0.01787-0.0262] |
| Haryana           | F   | 5q0       | 0.004 | [0.00220-0.0061] | 0.038 | [0.03314-0.0420] | 0.045    | [0.04082-0.0494] |
| Himachal Pradesh  | F   | 5q0       | 0.010 | [0.00734-0.0117] | 0.028 | [0.02454-0.0322] | 0.024    | [0.02053-0.0275] |
| INDIA             | F   | 5q0       | 0.009 | [0.00687-0.0119] | 0.043 | [0.03815-0.0476] | 0.042    | [0.03737-0.0468] |
| Jammu and Kashmir | F   | 5q0       | 0.018 | [0.01509-0.0208] | 0.036 | [0.03253-0.0403] | 0.029    | [0.02507-0.0330] |
| Jharkhand         | F   | 5q0       | 0.008 | [0.00543-0.0103] | 0.037 | [0.03286-0.0411] | 0.056    | [0.05063-0.0616] |
| Karnataka         | F   | 5q0       | 0.013 | [0.00977-0.0159] | 0.027 | [0.02338-0.0298] | 0.030    | [0.02629-0.0338] |
| Kerala            | F   | 5q0       | 0.007 | [0.00521-0.0090] | 0.011 | [0.00862-0.0129] | 0.013    | [0.01023-0.0158] |
| Madhya Pradesh    | F   | 5q0       | 0.010 | [0.00753-0.0132] | 0.045 | [0.04020-0.0502] | 0.058    | [0.05344-0.0629] |
| Maharashtra       | F   | 5q0       | 0.010 | [0.00734-0.0119] | 0.024 | [0.02071-0.0279] | 0.021    | [0.01753-0.0245] |
| Odisha            | F   | 5q0       | 0.018 | [0.01427-0.0212] | 0.045 | [0.04002-0.0498] | 0.042    | [0.03741-0.0467] |
| Punjab            | F   | 5q0       | 0.006 | [0.00387-0.0076] | 0.034 | [0.02916-0.0384] | 0.027    | [0.02374-0.0303] |
| Rajasthan         | F   | 5q0       | 0.007 | [0.00471-0.0087] | 0.051 | [0.04568-0.0561] | 0.057    | [0.05170-0.0626] |
| Tamil Nadu        | F   | 5q0       | 0.011 | [0.00835-0.0133] | 0.015 | [0.01249-0.0180] | 0.022    | [0.01851-0.0255] |

## UNCERTAINTY ESTIMATES

| location_code     | Sex | Indicator | CRS   | 95% UI           | GBD   | 95% UI           | Modmatch | 95% UI           |
|-------------------|-----|-----------|-------|------------------|-------|------------------|----------|------------------|
| Telangana         | F   | 5q0       | 0.012 | [0.00977-0.0145] | 0.023 | [0.01987-0.0263] | 0.033    | [0.02889-0.0372] |
| Uttar Pradesh     | F   | 5q0       | 0.006 | [0.00356-0.0081] | 0.064 | [0.05857-0.0690] | 0.070    | [0.06329-0.0771] |
| Uttarakhand       | F   | 5q0       | 0.005 | [0.00328-0.0066] | 0.029 | [0.02430-0.0328] | 0.049    | [0.04389-0.0543] |
| West Bengal       | F   | 5q0       | 0.011 | [0.00867-0.0138] | 0.030 | [0.02649-0.0333] | 0.029    | [0.02498-0.0331] |
| Andhra Pradesh    | F   | e0        | 77.3  | [76.64-78.05]    | 71.8  | [71.21-72.32]    | 71.5     | [70.74-72.20]    |
| Assam             | F   | e0        | 80.3  | [79.32-81.28]    | 67.7  | [67.02-68.44]    | 68.9     | [68.09-69.65]    |
| Bihar             | F   | e0        | 79.7  | [79.09-80.28]    | 68.6  | [67.77-69.35]    | 68.1     | [67.34-68.95]    |
| Chhattisgarh      | F   | e0        | 74.7  | [73.89-75.47]    | 68.4  | [67.65-69.06]    | 67.8     | [67.03-68.66]    |
| Gujarat           | F   | e0        | 76.2  | [75.64-76.80]    | 72.7  | [71.99-73.35]    | 73.1     | [72.44-73.77]    |
| Haryana           | F   | e0        | 75.2  | [74.57-75.84]    | 71.5  | [70.85-72.23]    | 70.9     | [70.27-71.59]    |
| Himachal Pradesh  | F   | e0        | 80.1  | [79.52-80.69]    | 77.1  | [76.49-77.77]    | 76.0     | [75.42-76.55]    |
| INDIA             | F   | e0        | 77.9  | [77.27-78.61]    | 70.3  | [69.68-70.97]    | 70.7     | [69.97-71.37]    |
| Jammu and Kashmir | F   | e0        | 85.9  | [84.80-87.01]    | 74.6  | [73.90-75.22]    | 72.9     | [72.31-73.52]    |
| Jharkhand         | F   | e0        | 77.6  | [76.99-78.18]    | 68.8  | [68.13-69.42]    | 68.8     | [68.05-69.61]    |
| Karnataka         | F   | e0        | 74.7  | [73.96-75.36]    | 69.7  | [69.01-70.35]    | 71.9     | [71.22-72.57]    |
| Kerala            | F   | e0        | 78.4  | [77.95-78.92]    | 77.3  | [76.79-77.87]    | 78.1     | [77.53-78.61]    |
| Madhya Pradesh    | F   | e0        | 78.6  | [77.78-79.37]    | 68.7  | [68.00-69.34]    | 69.2     | [68.58-69.76]    |
| Maharashtra       | F   | e0        | 78.3  | [77.64-79.02]    | 73.0  | [72.51-73.52]    | 74.1     | [73.47-74.70]    |
| Odisha            | F   | e0        | 72.8  | [72.12-73.43]    | 70.1  | [69.47-70.83]    | 69.9     | [69.08-70.65]    |
| Punjab            | F   | e0        | 76.1  | [75.46-76.79]    | 73.9  | [73.19-74.57]    | 72.3     | [71.69-72.82]    |
| Rajasthan         | F   | e0        | 76.7  | [76.02-77.38]    | 70.8  | [70.16-71.43]    | 70.2     | [69.52-70.86]    |
| Tamil Nadu        | F   | e0        | 75.0  | [74.38-75.71]    | 72.8  | [72.10-73.44]    | 73.6     | [72.93-74.27]    |
| Telangana         | F   | e0        | 81.5  | [80.57-82.38]    | 74.3  | [73.66-75.03]    | 72.1     | [71.49-72.79]    |

## UNCERTAINTY ESTIMATES

| location_code     | Sex | Indicator | CRS   | 95% UI           | GBD   | 95% UI           | Modmatch | 95% UI           |
|-------------------|-----|-----------|-------|------------------|-------|------------------|----------|------------------|
| Uttar Pradesh     | F   | e0        | 89.9  | [88.58-91.22]    | 66.1  | [65.42-66.80]    | 65.2     | [64.38-65.97]    |
| Uttarakhand       | F   | e0        | 84.8  | [84.24-85.35]    | 72.8  | [72.14-73.54]    | 69.4     | [68.71-70.17]    |
| West Bengal       | F   | e0        | 79.8  | [79.02-80.53]    | 72.2  | [71.60-72.84]    | 72.0     | [71.33-72.61]    |
| Andhra Pradesh    | M   | 40q30     | 0.441 | [0.42272-0.4585] | 0.353 | [0.33400-0.3718] | 0.425    | [0.40740-0.4430] |
| Assam             | M   | 40q30     | 0.426 | [0.40869-0.4437] | 0.399 | [0.38137-0.4165] | 0.401    | [0.38303-0.4192] |
| Bihar             | M   | 40q30     | 0.229 | [0.21024-0.2486] | 0.291 | [0.27274-0.3102] | 0.379    | [0.36227-0.3958] |
| Chhattisgarh      | M   | 40q30     | 0.492 | [0.47495-0.5096] | 0.513 | [0.49737-0.5292] | 0.405    | [0.38906-0.4213] |
| Gujarat           | M   | 40q30     | 0.363 | [0.34556-0.3797] | 0.371 | [0.35441-0.3883] | 0.375    | [0.35799-0.3912] |
| Haryana           | M   | 40q30     | 0.471 | [0.45262-0.4884] | 0.392 | [0.37218-0.4121] | 0.405    | [0.38585-0.4232] |
| Himachal Pradesh  | M   | 40q30     | 0.292 | [0.27303-0.3103] | 0.378 | [0.35765-0.3976] | 0.327    | [0.30634-0.3486] |
| INDIA             | M   | 40q30     | 0.361 | [0.34132-0.3805] | 0.366 | [0.34700-0.3846] | 0.367    | [0.35011-0.3832] |
| Jammu and Kashmir | M   | 40q30     | 0.241 | [0.22434-0.2570] | 0.286 | [0.27088-0.3006] | 0.315    | [0.29893-0.3313] |
| Jharkhand         | M   | 40q30     | 0.293 | [0.27414-0.3110] | 0.313 | [0.29451-0.3307] | 0.347    | [0.32665-0.3667] |
| Karnataka         | M   | 40q30     | 0.449 | [0.43221-0.4657] | 0.414 | [0.39468-0.4331] | 0.421    | [0.40430-0.4381] |
| Kerala            | M   | 40q30     | 0.341 | [0.32331-0.3594] | 0.333 | [0.31887-0.3471] | 0.335    | [0.31615-0.3533] |
| Madhya Pradesh    | M   | 40q30     | 0.395 | [0.37657-0.4131] | 0.382 | [0.36440-0.3999] | 0.376    | [0.36100-0.3918] |
| Maharashtra       | M   | 40q30     | 0.315 | [0.29634-0.3333] | 0.334 | [0.31843-0.3502] | 0.340    | [0.32155-0.3583] |
| Odisha            | M   | 40q30     | 0.417 | [0.39996-0.4338] | 0.347 | [0.32793-0.3667] | 0.373    | [0.35595-0.3907] |
| Punjab            | M   | 40q30     | 0.455 | [0.43720-0.4722] | 0.329 | [0.31074-0.3476] | 0.421    | [0.40342-0.4380] |
| Rajasthan         | M   | 40q30     | 0.458 | [0.44026-0.4748] | 0.412 | [0.39470-0.4291] | 0.416    | [0.39795-0.4345] |
| Tamil Nadu        | M   | 40q30     | 0.412 | [0.39397-0.4294] | 0.382 | [0.36425-0.4005] | 0.419    | [0.40170-0.4360] |
| Telangana         | M   | 40q30     | 0.358 | [0.33946-0.3757] | 0.330 | [0.31020-0.3489] | 0.371    | [0.34979-0.3917] |
| Uttar Pradesh     | M   | 40q30     | 0.263 | [0.24598-0.2802] | 0.410 | [0.39360-0.4264] | 0.408    | [0.39031-0.4262] |

## UNCERTAINTY ESTIMATES

| location_code     | Sex | Indicator | CRS   | 95% UI           | GBD   | 95% UI           | Modmatch | 95% UI           |
|-------------------|-----|-----------|-------|------------------|-------|------------------|----------|------------------|
| Uttarakhand       | M   | 40q30     | 0.216 | [0.20005-0.2324] | 0.424 | [0.40655-0.4422] | 0.408    | [0.39166-0.4253] |
| West Bengal       | M   | 40q30     | 0.325 | [0.30138-0.3488] | 0.342 | [0.32602-0.3571] | 0.312    | [0.29570-0.3288] |
| Andhra Pradesh    | M   | 45q15     | 0.252 | [0.23416-0.2704] | 0.198 | [0.18267-0.2138] | 0.245    | [0.22868-0.2609] |
| Assam             | M   | 45q15     | 0.176 | [0.15938-0.1922] | 0.223 | [0.20876-0.2370] | 0.224    | [0.20754-0.2411] |
| Bihar             | M   | 45q15     | 0.106 | [0.09224-0.1197] | 0.143 | [0.12616-0.1596] | 0.209    | [0.19223-0.2258] |
| Chhattisgarh      | M   | 45q15     | 0.235 | [0.21663-0.2533] | 0.273 | [0.25762-0.2889] | 0.233    | [0.21655-0.2504] |
| Gujarat           | M   | 45q15     | 0.209 | [0.19177-0.2253] | 0.207 | [0.19255-0.2222] | 0.202    | [0.18724-0.2175] |
| Haryana           | M   | 45q15     | 0.194 | [0.17890-0.2098] | 0.219 | [0.20062-0.2370] | 0.227    | [0.21177-0.2424] |
| Himachal Pradesh  | M   | 45q15     | 0.163 | [0.14675-0.1794] | 0.198 | [0.18142-0.2149] | 0.161    | [0.14490-0.1774] |
| INDIA             | M   | 45q15     | 0.179 | [0.16317-0.1950] | 0.201 | [0.18503-0.2169] | 0.194    | [0.18104-0.2074] |
| Jammu and Kashmir | M   | 45q15     | 0.067 | [0.05543-0.0783] | 0.160 | [0.14629-0.1735] | 0.152    | [0.13805-0.1661] |
| Jharkhand         | M   | 45q15     | 0.136 | [0.12262-0.1499] | 0.160 | [0.14627-0.1746] | 0.179    | [0.16255-0.1947] |
| Karnataka         | M   | 45q15     | 0.243 | [0.22645-0.2602] | 0.238 | [0.22066-0.2547] | 0.239    | [0.22251-0.2562] |
| Kerala            | M   | 45q15     | 0.161 | [0.14565-0.1758] | 0.159 | [0.14382-0.1733] | 0.159    | [0.14287-0.1751] |
| Madhya Pradesh    | M   | 45q15     | 0.187 | [0.17068-0.2025] | 0.226 | [0.20890-0.2430] | 0.206    | [0.19134-0.2209] |
| Maharashtra       | M   | 45q15     | 0.161 | [0.14716-0.1748] | 0.185 | [0.16954-0.1998] | 0.167    | [0.15387-0.1792] |
| Odisha            | M   | 45q15     | 0.206 | [0.18883-0.2227] | 0.186 | [0.17051-0.2008] | 0.201    | [0.18527-0.2169] |
| Punjab            | M   | 45q15     | 0.196 | [0.17895-0.2129] | 0.197 | [0.17981-0.2137] | 0.234    | [0.21794-0.2504] |
| Rajasthan         | M   | 45q15     | 0.254 | [0.23809-0.2705] | 0.233 | [0.21644-0.2506] | 0.242    | [0.22579-0.2589] |
| Tamil Nadu        | M   | 45q15     | 0.235 | [0.21895-0.2515] | 0.213 | [0.19699-0.2297] | 0.232    | [0.21596-0.2476] |
| Telangana         | M   | 45q15     | 0.164 | [0.14726-0.1800] | 0.179 | [0.16322-0.1949] | 0.196    | [0.17909-0.2130] |
| Uttar Pradesh     | M   | 45q15     | 0.119 | [0.10544-0.1333] | 0.236 | [0.21917-0.2523] | 0.238    | [0.22058-0.2546] |
| Uttarakhand       | M   | 45q15     | 0.108 | [0.09505-0.1219] | 0.229 | [0.21434-0.2440] | 0.237    | [0.22110-0.2520] |

**UNCERTAINTY ESTIMATES**

| <b>location_code</b> | <b>Sex</b> | <b>Indicator</b> | <b>CRS</b> | <b>95% UI</b>    | <b>GBD</b> | <b>95% UI</b>    | <b>Modmatch</b> | <b>95% UI</b>    |
|----------------------|------------|------------------|------------|------------------|------------|------------------|-----------------|------------------|
| West Bengal          | M          | 45q15            | 0.141      | [0.12473-0.1564] | 0.170      | [0.15464-0.1844] | 0.149           | [0.13754-0.1605] |
| Andhra Pradesh       | M          | 5q0              | 0.016      | [0.01254-0.0190] | 0.029      | [0.02549-0.0324] | 0.034           | [0.02964-0.0384] |
| Assam                | M          | 5q0              | 0.008      | [0.00566-0.0100] | 0.054      | [0.04826-0.0589] | 0.038           | [0.03377-0.0423] |
| Bihar                | M          | 5q0              | 0.005      | [0.00318-0.0069] | 0.047      | [0.04139-0.0519] | 0.061           | [0.05567-0.0666] |
| Chhattisgarh         | M          | 5q0              | 0.021      | [0.01767-0.0245] | 0.042      | [0.03793-0.0464] | 0.055           | [0.04917-0.0610] |
| Gujarat              | M          | 5q0              | 0.017      | [0.01370-0.0199] | 0.032      | [0.02840-0.0365] | 0.045           | [0.04033-0.0498] |
| Haryana              | M          | 5q0              | 0.004      | [0.00240-0.0059] | 0.032      | [0.02878-0.0352] | 0.037           | [0.03235-0.0417] |
| Himachal Pradesh     | M          | 5q0              | 0.011      | [0.00794-0.0136] | 0.031      | [0.02696-0.0344] | 0.031           | [0.02697-0.0351] |
| INDIA                | M          | 5q0              | 0.011      | [0.00784-0.0138] | 0.039      | [0.03469-0.0439] | 0.039           | [0.03436-0.0437] |
| Jammu and Kashmir    | M          | 5q0              | 0.014      | [0.01131-0.0169] | 0.033      | [0.02902-0.0363] | 0.033           | [0.02901-0.0371] |
| Jharkhand            | M          | 5q0              | 0.009      | [0.00595-0.0114] | 0.035      | [0.03038-0.0389] | 0.051           | [0.04605-0.0561] |
| Karnataka            | M          | 5q0              | 0.016      | [0.01262-0.0192] | 0.029      | [0.02534-0.0325] | 0.031           | [0.02652-0.0355] |
| Kerala               | M          | 5q0              | 0.008      | [0.00594-0.0107] | 0.011      | [0.00826-0.0130] | 0.013           | [0.01028-0.0157] |
| Madhya Pradesh       | M          | 5q0              | 0.011      | [0.00836-0.0146] | 0.043      | [0.03845-0.0476] | 0.058           | [0.05248-0.0637] |
| Maharashtra          | M          | 5q0              | 0.011      | [0.00842-0.0140] | 0.024      | [0.01996-0.0274] | 0.019           | [0.01605-0.0220] |
| Odisha               | M          | 5q0              | 0.023      | [0.01985-0.0270] | 0.051      | [0.04613-0.0557] | 0.044           | [0.03892-0.0492] |
| Punjab               | M          | 5q0              | 0.006      | [0.00361-0.0086] | 0.030      | [0.02601-0.0333] | 0.024           | [0.02056-0.0275] |
| Rajasthan            | M          | 5q0              | 0.009      | [0.00635-0.0107] | 0.044      | [0.03886-0.0485] | 0.048           | [0.04281-0.0533] |
| Tamil Nadu           | M          | 5q0              | 0.012      | [0.00942-0.0143] | 0.015      | [0.01301-0.0178] | 0.023           | [0.01938-0.0267] |
| Telangana            | M          | 5q0              | 0.011      | [0.00881-0.0141] | 0.024      | [0.02054-0.0266] | 0.033           | [0.02901-0.0371] |
| Uttar Pradesh        | M          | 5q0              | 0.006      | [0.00399-0.0083] | 0.054      | [0.04831-0.0597] | 0.059           | [0.05354-0.0647] |
| Uttarakhand          | M          | 5q0              | 0.005      | [0.00346-0.0069] | 0.028      | [0.02424-0.0318] | 0.054           | [0.04879-0.0594] |
| West Bengal          | M          | 5q0              | 0.014      | [0.01126-0.0158] | 0.031      | [0.02676-0.0346] | 0.026           | [0.02239-0.0297] |

**UNCERTAINTY ESTIMATES**

| <b>location_code</b> | <b>Sex</b> | <b>Indicator</b> | <b>CRS</b> | <b>95% UI</b> | <b>GBD</b> | <b>95% UI</b> | <b>Modmatch</b> | <b>95% UI</b> |
|----------------------|------------|------------------|------------|---------------|------------|---------------|-----------------|---------------|
| Andhra Pradesh       | M          | e0               | 68.9       | [68.15-69.68] | 69.1       | [68.51-69.75] | 65.500          | [64.80-66.17] |
| Assam                | M          | e0               | 77.7       | [76.75-78.62] | 65.7       | [64.88-66.44] | 66.0            | [65.30-66.73] |
| Bihar                | M          | e0               | 77.1       | [76.54-77.72] | 69.8       | [69.10-70.49] | 64.7            | [63.89-65.44] |
| Chhattisgarh         | M          | e0               | 68.5       | [67.64-69.28] | 62.1       | [61.60-62.68] | 64.1            | [63.35-64.84] |
| Gujarat              | M          | e0               | 69.7       | [69.01-70.44] | 69.1       | [68.45-69.71] | 66.4            | [65.71-67.06] |
| Haryana              | M          | e0               | 70.2       | [69.60-70.80] | 68.3       | [67.60-68.96] | 66.0            | [65.36-66.61] |
| Himachal Pradesh     | M          | e0               | 74.2       | [73.52-74.87] | 68.4       | [67.66-69.18] | 69.7            | [68.91-70.43] |
| INDIA                | M          | e0               | 72.5       | [71.80-73.24] | 68.0       | [67.22-68.71] | 67.3            | [66.76-67.85] |
| Jammu and Kashmir    | M          | e0               | 79.2       | [78.60-79.85] | 72.0       | [71.44-72.60] | 70.0            | [69.35-70.57] |
| Jharkhand            | M          | e0               | 74.5       | [73.85-75.12] | 70.0       | [69.36-70.70] | 67.0            | [66.21-67.74] |
| Karnataka            | M          | e0               | 67.6       | [66.90-68.26] | 66.5       | [65.80-67.24] | 66.0            | [65.27-66.72] |
| Kerala               | M          | e0               | 72.1       | [71.43-72.67] | 71.6       | [71.09-72.06] | 71.5            | [70.78-72.19] |
| Madhya Pradesh       | M          | e0               | 71.6       | [70.84-72.28] | 66.4       | [65.71-67.02] | 65.1            | [64.29-65.83] |
| Maharashtra          | M          | e0               | 73.8       | [73.14-74.37] | 71.0       | [70.33-71.58] | 70.5            | [69.95-71.09] |
| Odisha               | M          | e0               | 68.3       | [67.63-68.91] | 67.2       | [66.53-67.94] | 66.5            | [65.83-67.23] |
| Punjab               | M          | e0               | 71.2       | [70.45-71.88] | 71.3       | [70.60-72.09] | 66.9            | [66.25-67.49] |
| Rajasthan            | M          | e0               | 67.8       | [67.16-68.36] | 66.1       | [65.38-66.83] | 64.3            | [63.57-65.08] |
| Tamil Nadu           | M          | e0               | 69.1       | [68.46-69.77] | 69.3       | [68.61-69.96] | 67.1            | [66.48-67.66] |
| Telangana            | M          | e0               | 75.2       | [74.42-75.94] | 71.2       | [70.57-71.88] | 67.8            | [67.11-68.42] |
| Uttar Pradesh        | M          | e0               | 81.9       | [81.06-82.81] | 65.2       | [64.55-65.93] | 63.6            | [62.77-64.36] |
| Uttarakhand          | M          | e0               | 80.0       | [79.25-80.67] | 67.0       | [66.35-67.57] | 64.0            | [63.33-64.76] |
| West Bengal          | M          | e0               | 75.5       | [74.76-76.33] | 69.8       | [69.18-70.32] | 70.8            | [70.10-71.47] |



## APPENDIX 2: Uncertainty analysis c

Method: We used a bootstrap method to estimate from each source, following the distribution across ages, and we then used to construct life expectancy estimates from age-specific mortality

## UNCERTAINTY ESTIMATES

| location_code     | Sex | NBE   | 95% UI           | NFHS  | 95% UI           | SRS   | 95% UI           |
|-------------------|-----|-------|------------------|-------|------------------|-------|------------------|
| Andhra Pradesh    | F   | 0.307 | [0.28847-0.3254] | 0.267 | [0.25002-0.2841] | 0.307 | [0.29092-0.3236] |
| Assam             | F   | 0.262 | [0.24443-0.2795] | 0.269 | [0.25155-0.2858] | 0.284 | [0.26944-0.2995] |
| Bihar             | F   | 0.295 | [0.27636-0.3129] | 0.317 | [0.30107-0.3329] | 0.287 | [0.26781-0.3053] |
| Chhattisgarh      | F   | 0.298 | [0.28013-0.3154] | 0.306 | [0.28849-0.3243] | 0.335 | [0.31781-0.3521] |
| Gujarat           | F   | 0.235 | [0.21911-0.2511] | 0.226 | [0.20905-0.2420] | 0.261 | [0.24653-0.2745] |
| Haryana           | F   | 0.254 | [0.23693-0.2702] | 0.246 | [0.23176-0.2610] | 0.255 | [0.23715-0.2728] |
| Himachal Pradesh  | F   |       |                  | 0.173 | [0.15818-0.1877] | 0.189 | [0.17262-0.2061] |
| INDIA             | F   | 0.276 | [0.25734-0.2949] | 0.245 | [0.22867-0.2614] | 0.276 | [0.25858-0.2943] |
| Jammu and Kashmir | F   | 0.192 | [0.17500-0.2081] | 0.272 | [0.25652-0.2881] | 0.220 | [0.20196-0.2387] |
| Jharkhand         | F   | 0.297 | [0.27999-0.3132] | 0.263 | [0.24687-0.2798] | 0.340 | [0.32202-0.3572] |
| Karnataka         | F   | 0.301 | [0.28231-0.3205] | 0.179 | [0.16321-0.1938] | 0.303 | [0.28422-0.3218] |
| Kerala            | F   | 0.191 | [0.17364-0.2083] | 0.133 | [0.11932-0.1475] | 0.180 | [0.16486-0.1961] |
| Madhya Pradesh    | F   | 0.267 | [0.25201-0.2823] | 0.249 | [0.23095-0.2668] | 0.262 | [0.24597-0.2774] |
| Maharashtra       | F   | 0.259 | [0.24338-0.2754] | 0.187 | [0.17065-0.2035] | 0.262 | [0.24546-0.2781] |
| Odisha            | F   | 0.272 | [0.25544-0.2878] | 0.293 | [0.27651-0.3090] | 0.298 | [0.28081-0.3150] |
| Punjab            | F   | 0.228 | [0.21128-0.2442] | 0.247 | [0.23062-0.2638] | 0.281 | [0.26324-0.2986] |

## UNCERTAINTY ESTIMATES

| location_code     | Sex | NBE   | 95% UI           | NFHS  | 95% UI           | SRS   | 95% UI           |
|-------------------|-----|-------|------------------|-------|------------------|-------|------------------|
| Rajasthan         | F   | 0.242 | [0.22616-0.2570] | 0.199 | [0.18413-0.2141] | 0.244 | [0.22706-0.2614] |
| Tamil Nadu        | F   | 0.248 | [0.23323-0.2635] | 0.240 | [0.22227-0.2575] | 0.249 | [0.23135-0.2664] |
| Telangana         | F   |       |                  | 0.244 | [0.22768-0.2607] | 0.297 | [0.28202-0.3124] |
| Uttar Pradesh     | F   | 0.338 | [0.31906-0.3566] | 0.276 | [0.25885-0.2923] | 0.317 | [0.29992-0.3334] |
| Uttarakhand       | F   |       |                  | 0.223 | [0.20695-0.2392] | 0.287 | [0.26851-0.3062] |
| West Bengal       | F   | 0.276 | [0.25674-0.2949] | 0.289 | [0.27095-0.3077] | 0.285 | [0.26781-0.3032] |
| Andhra Pradesh    | F   | 0.147 | [0.12963-0.1635] | 0.129 | [0.11366-0.1445] | 0.147 | [0.13370-0.1599] |
| Assam             | F   | 0.124 | [0.11126-0.1361] | 0.133 | [0.11848-0.1472] | 0.157 | [0.14201-0.1711] |
| Bihar             | F   | 0.125 | [0.11144-0.1385] | 0.162 | [0.14776-0.1771] | 0.131 | [0.11835-0.1438] |
| Chhattisgarh      | F   | 0.141 | [0.12695-0.1543] | 0.173 | [0.15834-0.1876] | 0.183 | [0.16743-0.1977] |
| Gujarat           | F   | 0.114 | [0.10015-0.1278] | 0.107 | [0.09366-0.1207] | 0.120 | [0.10714-0.1333] |
| Haryana           | F   | 0.126 | [0.11386-0.1373] | 0.113 | [0.10064-0.1257] | 0.124 | [0.10997-0.1371] |
| Himachal Pradesh  | F   |       |                  | 0.087 | [0.07417-0.0998] | 0.083 | [0.07208-0.0936] |
| INDIA             | F   | 0.130 | [0.11706-0.1432] | 0.122 | [0.10917-0.1349] | 0.137 | [0.12157-0.1521] |
| Jammu and Kashmir | F   | 0.097 | [0.08250-0.1118] | 0.100 | [0.08785-0.1119] | 0.123 | [0.10741-0.1379] |
| Jharkhand         | F   | 0.139 | [0.12303-0.1548] | 0.120 | [0.10615-0.1338] | 0.148 | [0.13390-0.1616] |
| Karnataka         | F   | 0.143 | [0.12817-0.1587] | 0.092 | [0.07980-0.1045] | 0.138 | [0.12276-0.1539] |
| Kerala            | F   | 0.080 | [0.06851-0.0914] | 0.056 | [0.04637-0.0663] | 0.069 | [0.05823-0.0790] |
| Madhya Pradesh    | F   | 0.125 | [0.11159-0.1392] | 0.127 | [0.11215-0.1422] | 0.135 | [0.12037-0.1500] |
| Maharashtra       | F   | 0.124 | [0.11095-0.1365] | 0.089 | [0.07500-0.1025] | 0.118 | [0.10475-0.1316] |
| Odisha            | F   | 0.134 | [0.12056-0.1476] | 0.137 | [0.12500-0.1494] | 0.151 | [0.13607-0.1649] |
| Punjab            | F   | 0.121 | [0.10923-0.1325] | 0.113 | [0.10091-0.1259] | 0.137 | [0.12278-0.1506] |
| Rajasthan         | F   | 0.113 | [0.10062-0.1254] | 0.099 | [0.08770-0.1099] | 0.118 | [0.10503-0.1316] |

**UNCERTAINTY ESTIMATES**

| <b>location_code</b> | <b>Sex</b> | <b>NBE</b> | <b>95% UI</b>    | <b>NFHS</b> | <b>95% UI</b>    | <b>SRS</b> | <b>95% UI</b>    |
|----------------------|------------|------------|------------------|-------------|------------------|------------|------------------|
| Tamil Nadu           | F          | 0.116      | [0.10457-0.1279] | 0.114       | [0.10110-0.1273] | 0.108      | [0.09467-0.1217] |
| Telangana            | F          |            |                  | 0.141       | [0.12757-0.1550] | 0.127      | [0.11262-0.1405] |
| Uttar Pradesh        | F          | 0.174      | [0.15867-0.1888] | 0.136       | [0.12369-0.1474] | 0.189      | [0.17367-0.2043] |
| Uttarakhand          | F          |            |                  | 0.108       | [0.09542-0.1214] | 0.150      | [0.13627-0.1640] |
| West Bengal          | F          | 0.112      | [0.10093-0.1238] | 0.123       | [0.10998-0.1364] | 0.139      | [0.12416-0.1535] |
| Andhra Pradesh       | F          | 0.041      | [0.03752-0.0454] | 0.027       | [0.02315-0.0310] | 0.029      | [0.02564-0.0330] |
| Assam                | F          | 0.052      | [0.04665-0.0570] | 0.053       | [0.04791-0.0586] | 0.049      | [0.04473-0.0538] |
| Bihar                | F          | 0.043      | [0.03844-0.0476] | 0.053       | [0.04773-0.0580] | 0.040      | [0.03542-0.0438] |
| Chhattisgarh         | F          | 0.050      | [0.04532-0.0548] | 0.062       | [0.05644-0.0680] | 0.046      | [0.04156-0.0507] |
| Gujarat              | F          | 0.043      | [0.03905-0.0476] | 0.038       | [0.03338-0.0432] | 0.044      | [0.03940-0.0483] |
| Haryana              | F          | 0.044      | [0.03930-0.0485] | 0.041       | [0.03688-0.0455] | 0.045      | [0.04032-0.0500] |
| Himachal Pradesh     | F          |            |                  | 0.031       | [0.02689-0.0350] | 0.024      | [0.02092-0.0275] |
| INDIA                | F          | 0.045      | [0.04108-0.0485] | 0.047       | [0.04169-0.0532] | 0.042      | [0.03776-0.0466] |
| Jammu and Kashmir    | F          | 0.034      | [0.03045-0.0374] | 0.035       | [0.03082-0.0394] | 0.029      | [0.02534-0.0323] |
| Jharkhand            | F          | 0.042      | [0.03786-0.0457] | 0.056       | [0.05080-0.0608] | 0.038      | [0.03436-0.0421] |
| Karnataka            | F          | 0.037      | [0.03283-0.0404] | 0.029       | [0.02499-0.0325] | 0.030      | [0.02586-0.0337] |
| Kerala               | F          | 0.012      | [0.01012-0.0148] | 0.006       | [0.00380-0.0075] | 0.013      | [0.01032-0.0150] |
| Madhya Pradesh       | F          | 0.065      | [0.05896-0.0701] | 0.062       | [0.05622-0.0673] | 0.058      | [0.05307-0.0637] |
| Maharashtra          | F          | 0.022      | [0.01901-0.0252] | 0.021       | [0.01831-0.0245] | 0.021      | [0.01791-0.0240] |
| Odisha               | F          | 0.054      | [0.04876-0.0592] | 0.046       | [0.04231-0.0507] | 0.043      | [0.03792-0.0472] |
| Punjab               | F          | 0.031      | [0.02722-0.0344] | 0.037       | [0.03284-0.0410] | 0.027      | [0.02368-0.0308] |
| Rajasthan            | F          | 0.056      | [0.05164-0.0609] | 0.050       | [0.04427-0.0552] | 0.057      | [0.05284-0.0618] |
| Tamil Nadu           | F          | 0.021      | [0.01819-0.0244] | 0.024       | [0.02035-0.0282] | 0.022      | [0.01904-0.0250] |

**UNCERTAINTY ESTIMATES**

| <b>location_code</b> | <b>Sex</b> | <b>NBE</b> | <b>95% UI</b>    | <b>NFHS</b> | <b>95% UI</b>    | <b>SRS</b> | <b>95% UI</b>    |
|----------------------|------------|------------|------------------|-------------|------------------|------------|------------------|
| Telangana            | F          |            |                  | 0.040       | [0.03676-0.0441] | 0.034      | [0.03028-0.0381] |
| Uttar Pradesh        | F          | 0.064      | [0.05827-0.0697] | 0.082       | [0.07566-0.0879] | 0.070      | [0.06536-0.0756] |
| Uttarakhand          | F          |            |                  | 0.049       | [0.04413-0.0547] | 0.026      | [0.02242-0.0297] |
| West Bengal          | F          | 0.028      | [0.02397-0.0316] | 0.024       | [0.02070-0.0270] | 0.029      | [0.02460-0.0325] |
| Andhra Pradesh       | F          | 71.0       | [70.20-71.71]    | 70.7        | [69.90-71.45]    | 71.3       | [70.68-71.92]    |
| Assam                | F          | 70.5       | [69.71-71.21]    | 69.4        | [68.65-70.16]    | 68.9       | [68.17-69.73]    |
| Bihar                | F          | 69.1       | [68.37-69.74]    | 66.2        | [65.46-66.89]    | 69.4       | [68.84-69.96]    |
| Chhattisgarh         | F          | 68.1       | [67.45-68.82]    | 66.1        | [65.45-66.70]    | 67.3       | [66.56-67.97]    |
| Gujarat              | F          | 73.6       | [72.81-74.33]    | 71.7        | [70.94-72.37]    | 72.3       | [71.57-72.95]    |
| Haryana              | F          | 72.4       | [71.61-73.10]    | 71.3        | [70.70-71.93]    | 72.7       | [71.93-73.50]    |
| Himachal Pradesh     | F          |            |                  | 74.4        | [73.64-75.11]    | 76.7       | [76.12-77.27]    |
| INDIA                | F          | 70.6       | [69.97-71.29]    | 69.6        | [68.95-70.33]    | 71.0       | [70.28-71.72]    |
| Jammu and Kashmir    | F          | 81.7       | [80.65-82.68]    | 71.5        | [70.89-72.04]    | 78.2       | [77.29-79.08]    |
| Jharkhand            | F          | 69.8       | [69.02-70.57]    | 69.2        | [68.57-69.88]    | 68.7       | [68.10-69.32]    |
| Karnataka            | F          | 69.6       | [68.90-70.29]    | 74.5        | [73.84-75.19]    | 71.2       | [70.46-71.91]    |
| Kerala               | F          | 78.1       | [77.49-78.79]    | 80.1        | [79.48-80.62]    | 78.1       | [77.59-78.60]    |
| Madhya Pradesh       | F          | 67.9       | [67.20-68.62]    | 68.4        | [67.53-69.21]    | 69.2       | [68.56-69.93]    |
| Maharashtra          | F          | 73.6       | [73.04-74.25]    | 74.3        | [73.63-74.92]    | 73.9       | [73.40-74.46]    |
| Odisha               | F          | 70.1       | [69.31-70.81]    | 67.8        | [67.16-68.54]    | 70.7       | [69.89-71.46]    |
| Punjab               | F          | 75.4       | [74.61-76.10]    | 71.6        | [70.91-72.25]    | 73.8       | [73.15-74.48]    |
| Rajasthan            | F          | 71.3       | [70.63-72.05]    | 71.9        | [71.19-72.61]    | 71.6       | [70.92-72.38]    |
| Tamil Nadu           | F          | 74.0       | [73.31-74.65]    | 72.3        | [71.81-72.80]    | 74.2       | [73.54-74.83]    |
| Telangana            | F          |            |                  | 69.8        | [69.12-70.39]    | 70.5       | [69.86-71.17]    |

## UNCERTAINTY ESTIMATES

| location_code     | Sex | NBE   | 95% UI           | NFHS  | 95% UI           | SRS   | 95% UI           |
|-------------------|-----|-------|------------------|-------|------------------|-------|------------------|
| Uttar Pradesh     | F   | 66.6  | [65.89-67.29]    | 65.8  | [65.01-66.50]    | 66.4  | [65.60-67.26]    |
| Uttarakhand       | F   |       |                  | 70.5  | [69.82-71.19]    | 72.9  | [72.14-73.59]    |
| West Bengal       | F   | 72.4  | [71.77-72.98]    | 70.6  | [69.99-71.19]    | 72.5  | [71.81-73.13]    |
| Andhra Pradesh    | M   | 0.378 | [0.35975-0.3959] | 0.371 | [0.35532-0.3872] | 0.397 | [0.37686-0.4165] |
| Assam             | M   | 0.351 | [0.33517-0.3676] | 0.383 | [0.36585-0.4003] | 0.373 | [0.35796-0.3888] |
| Bihar             | M   | 0.298 | [0.28014-0.3154] | 0.336 | [0.31814-0.3544] | 0.290 | [0.27366-0.3071] |
| Chhattisgarh      | M   | 0.438 | [0.42038-0.4561] | 0.391 | [0.37419-0.4085] | 0.419 | [0.40257-0.4346] |
| Gujarat           | M   | 0.361 | [0.34349-0.3785] | 0.383 | [0.36619-0.3991] | 0.376 | [0.35887-0.3926] |
| Haryana           | M   | 0.391 | [0.37184-0.4094] | 0.370 | [0.35117-0.3890] | 0.400 | [0.38229-0.4174] |
| Himachal Pradesh  | M   |       |                  | 0.337 | [0.31780-0.3558] | 0.340 | [0.32432-0.3553] |
| INDIA             | M   | 0.368 | [0.34781-0.3886] | 0.340 | [0.32088-0.3590] | 0.354 | [0.33860-0.3691] |
| Jammu and Kashmir | M   | 0.289 | [0.27415-0.3048] | 0.285 | [0.26938-0.3014] | 0.290 | [0.27261-0.3079] |
| Jharkhand         | M   | 0.320 | [0.30406-0.3352] | 0.319 | [0.30094-0.3365] | 0.286 | [0.26981-0.3030] |
| Karnataka         | M   | 0.405 | [0.38753-0.4223] | 0.298 | [0.27943-0.3162] | 0.365 | [0.34667-0.3836] |
| Kerala            | M   | 0.331 | [0.31210-0.3503] | 0.267 | [0.25098-0.2830] | 0.313 | [0.29537-0.3307] |
| Madhya Pradesh    | M   | 0.400 | [0.38078-0.4186] | 0.343 | [0.32512-0.3610] | 0.344 | [0.32526-0.3624] |
| Maharashtra       | M   | 0.336 | [0.31802-0.3537] | 0.298 | [0.28135-0.3156] | 0.326 | [0.30916-0.3433] |
| Odisha            | M   | 0.357 | [0.33924-0.3749] | 0.330 | [0.31107-0.3480] | 0.354 | [0.33663-0.3713] |
| Punjab            | M   | 0.334 | [0.31530-0.3534] | 0.311 | [0.29456-0.3275] | 0.411 | [0.39080-0.4306] |
| Rajasthan         | M   | 0.419 | [0.40279-0.4352] | 0.307 | [0.29060-0.3233] | 0.397 | [0.37777-0.4153] |
| Tamil Nadu        | M   | 0.365 | [0.34796-0.3828] | 0.352 | [0.33149-0.3728] | 0.348 | [0.32995-0.3656] |
| Telangana         | M   |       |                  | 0.421 | [0.40294-0.4386] | 0.359 | [0.34056-0.3778] |
| Uttar Pradesh     | M   | 0.431 | [0.41323-0.4482] | 0.347 | [0.33033-0.3638] | 0.408 | [0.39115-0.4249] |

**UNCERTAINTY ESTIMATES**

| <b>location_code</b> | <b>Sex</b> | <b>NBE</b> | <b>95% UI</b>    | <b>NFHS</b> | <b>95% UI</b>    | <b>SRS</b> | <b>95% UI</b>    |
|----------------------|------------|------------|------------------|-------------|------------------|------------|------------------|
| Uttarakhand          | M          |            |                  | 0.378       | [0.35980-0.3957] | 0.441      | [0.42495-0.4570] |
| West Bengal          | M          | 0.328      | [0.31038-0.3448] | 0.351       | [0.33512-0.3672] | 0.307      | [0.29050-0.3242] |
| Andhra Pradesh       | M          | 0.218      | [0.20075-0.2351] | 0.235       | [0.21898-0.2508] | 0.221      | [0.20463-0.2369] |
| Assam                | M          | 0.202      | [0.18844-0.2147] | 0.206       | [0.19097-0.2206] | 0.224      | [0.20985-0.2389] |
| Bihar                | M          | 0.143      | [0.12931-0.1577] | 0.208       | [0.19054-0.2251] | 0.154      | [0.13939-0.1677] |
| Chhattisgarh         | M          | 0.241      | [0.22439-0.2571] | 0.218       | [0.20269-0.2334] | 0.234      | [0.21851-0.2493] |
| Gujarat              | M          | 0.205      | [0.19066-0.2195] | 0.227       | [0.21167-0.2432] | 0.203      | [0.18827-0.2187] |
| Haryana              | M          | 0.231      | [0.21629-0.2451] | 0.208       | [0.19106-0.2240] | 0.225      | [0.20877-0.2416] |
| Himachal Pradesh     | M          |            |                  | 0.210       | [0.19360-0.2262] | 0.162      | [0.14481-0.1795] |
| INDIA                | M          | 0.203      | [0.18639-0.2186] | 0.199       | [0.18447-0.2131] | 0.194      | [0.17990-0.2085] |
| Jammu and Kashmir    | M          | 0.152      | [0.13726-0.1662] | 0.140       | [0.12642-0.1545] | 0.154      | [0.13821-0.1689] |
| Jharkhand            | M          | 0.170      | [0.15561-0.1835] | 0.180       | [0.16252-0.1984] | 0.164      | [0.14970-0.1783] |
| Karnataka            | M          | 0.232      | [0.21419-0.2498] | 0.185       | [0.17174-0.1985] | 0.204      | [0.18756-0.2210] |
| Kerala               | M          | 0.170      | [0.15600-0.1830] | 0.141       | [0.12685-0.1554] | 0.135      | [0.12069-0.1488] |
| Madhya Pradesh       | M          | 0.229      | [0.21129-0.2463] | 0.193       | [0.17882-0.2069] | 0.205      | [0.18950-0.2200] |
| Maharashtra          | M          | 0.188      | [0.17107-0.2042] | 0.176       | [0.16033-0.1923] | 0.167      | [0.15251-0.1814] |
| Odisha               | M          | 0.194      | [0.17792-0.2105] | 0.215       | [0.19737-0.2322] | 0.192      | [0.17502-0.2081] |
| Punjab               | M          | 0.202      | [0.18374-0.2197] | 0.186       | [0.17191-0.2003] | 0.236      | [0.21925-0.2536] |
| Rajasthan            | M          | 0.234      | [0.21787-0.2499] | 0.185       | [0.16945-0.2004] | 0.217      | [0.19922-0.2348] |
| Tamil Nadu           | M          | 0.200      | [0.18434-0.2163] | 0.201       | [0.18346-0.2189] | 0.195      | [0.17966-0.2109] |
| Telangana            | M          |            |                  | 0.294       | [0.27752-0.3112] | 0.197      | [0.17971-0.2135] |
| Uttar Pradesh        | M          | 0.244      | [0.22716-0.2618] | 0.199       | [0.18433-0.2146] | 0.241      | [0.22279-0.2593] |
| Uttarakhand          | M          |            |                  | 0.234       | [0.21781-0.2506] | 0.243      | [0.22614-0.2589] |

## UNCERTAINTY ESTIMATES

| location_code     | Sex | NBE   | 95% UI           | NFHS  | 95% UI           | SRS   | 95% UI           |
|-------------------|-----|-------|------------------|-------|------------------|-------|------------------|
| West Bengal       | M   | 0.162 | [0.14751-0.1762] | 0.167 | [0.15216-0.1827] | 0.149 | [0.13604-0.1621] |
| Andhra Pradesh    | M   | 0.041 | [0.03673-0.0456] | 0.045 | [0.04133-0.0492] | 0.034 | [0.02970-0.0383] |
| Assam             | M   | 0.045 | [0.04003-0.0494] | 0.061 | [0.05620-0.0657] | 0.038 | [0.03394-0.0423] |
| Bihar             | M   | 0.042 | [0.03721-0.0463] | 0.061 | [0.05692-0.0660] | 0.034 | [0.03038-0.0384] |
| Chhattisgarh      | M   | 0.047 | [0.04216-0.0517] | 0.069 | [0.06332-0.0743] | 0.055 | [0.04875-0.0608] |
| Gujarat           | M   | 0.045 | [0.04037-0.0494] | 0.048 | [0.04373-0.0527] | 0.045 | [0.04098-0.0490] |
| Haryana           | M   | 0.042 | [0.03799-0.0461] | 0.035 | [0.03139-0.0386] | 0.037 | [0.03237-0.0413] |
| Himachal Pradesh  | M   |       |                  | 0.043 | [0.03911-0.0476] | 0.031 | [0.02781-0.0351] |
| INDIA             | M   | 0.043 | [0.03822-0.0471] | 0.051 | [0.04631-0.0560] | 0.039 | [0.03523-0.0435] |
| Jammu and Kashmir | M   | 0.034 | [0.02986-0.0374] | 0.042 | [0.03776-0.0468] | 0.032 | [0.02925-0.0357] |
| Jharkhand         | M   | 0.038 | [0.03316-0.0426] | 0.051 | [0.04613-0.0554] | 0.032 | [0.02828-0.0365] |
| Karnataka         | M   | 0.033 | [0.02863-0.0365] | 0.036 | [0.03284-0.0401] | 0.031 | [0.02768-0.0348] |
| Kerala            | M   | 0.011 | [0.00806-0.0134] | 0.010 | [0.00759-0.0129] | 0.013 | [0.01047-0.0163] |
| Madhya Pradesh    | M   | 0.066 | [0.06049-0.0714] | 0.066 | [0.06135-0.0714] | 0.058 | [0.05240-0.0635] |
| Maharashtra       | M   | 0.021 | [0.01782-0.0240] | 0.032 | [0.02802-0.0351] | 0.019 | [0.01624-0.0222] |
| Odisha            | M   | 0.056 | [0.05130-0.0614] | 0.049 | [0.04449-0.0537] | 0.044 | [0.03911-0.0483] |
| Punjab            | M   | 0.026 | [0.02338-0.0295] | 0.029 | [0.02504-0.0332] | 0.024 | [0.02024-0.0269] |
| Rajasthan         | M   | 0.051 | [0.04594-0.0556] | 0.055 | [0.04998-0.0594] | 0.048 | [0.04351-0.0525] |
| Tamil Nadu        | M   | 0.021 | [0.01744-0.0241] | 0.034 | [0.02937-0.0386] | 0.023 | [0.01931-0.0261] |
| Telangana         | M   |       |                  | 0.029 | [0.02583-0.0330] | 0.033 | [0.02834-0.0369] |
| Uttar Pradesh     | M   | 0.059 | [0.05408-0.0635] | 0.077 | [0.07097-0.0827] | 0.059 | [0.05494-0.0639] |
| Uttarakhand       | M   |       |                  | 0.054 | [0.04962-0.0589] | 0.031 | [0.02709-0.0344] |
| West Bengal       | M   | 0.027 | [0.02348-0.0310] | 0.039 | [0.03430-0.0439] | 0.026 | [0.02257-0.0293] |

**UNCERTAINTY ESTIMATES**

| <b>location_code</b> | <b>Sex</b> | <b>NBE</b> | <b>95% UI</b> | <b>NFHS</b> | <b>95% UI</b> | <b>SRS</b> | <b>95% UI</b> |
|----------------------|------------|------------|---------------|-------------|---------------|------------|---------------|
| Andhra Pradesh       | M          | 67.9       | [67.08-68.68] | 64.2        | [63.50-64.85] | 68.2       | [67.55-68.87] |
| Assam                | M          | 68.4       | [67.72-69.16] | 65.2        | [64.45-65.96] | 67.2       | [66.58-67.83] |
| Bihar                | M          | 69.6       | [68.97-70.19] | 63.9        | [63.13-64.57] | 69.5       | [68.91-70.13] |
| Chhattisgarh         | M          | 63.8       | [63.07-64.47] | 62.8        | [62.15-63.54] | 63.3       | [62.53-64.09] |
| Gujarat              | M          | 67.8       | [67.04-68.46] | 65.6        | [64.92-66.31] | 67.4       | [66.84-68.02] |
| Haryana              | M          | 67.2       | [66.48-67.99] | 67.1        | [66.38-67.79] | 67.8       | [67.09-68.44] |
| Himachal Pradesh     | M          |            |               | 68.5        | [67.71-69.23] | 70.9       | [70.27-71.54] |
| INDIA                | M          | 67.4       | [66.73-68.10] | 66.0        | [65.30-66.69] | 68.3       | [67.69-68.94] |
| Jammu and Kashmir    | M          | 73.5       | [72.79-74.17] | 69.5        | [68.88-70.09] | 74.2       | [73.41-74.95] |
| Jharkhand            | M          | 69.3       | [68.59-70.10] | 66.6        | [65.83-67.41] | 70.3       | [69.61-70.95] |
| Karnataka            | M          | 66.3       | [65.62-66.99] | 69.0        | [68.43-69.65] | 67.6       | [66.88-68.33] |
| Kerala               | M          | 72.1       | [71.48-72.74] | 73.5        | [72.76-74.16] | 72.6       | [71.99-73.13] |
| Madhya Pradesh       | M          | 63.4       | [62.66-64.07] | 64.3        | [63.62-64.93] | 65.5       | [64.76-66.28] |
| Maharashtra          | M          | 71.1       | [70.41-71.84] | 69.4        | [68.75-70.05] | 71.8       | [71.29-72.41] |
| Odisha               | M          | 66.6       | [65.96-67.29] | 65.9        | [65.04-66.67] | 68.5       | [67.78-69.14] |
| Punjab               | M          | 71.5       | [70.60-72.36] | 69.6        | [68.99-70.29] | 69.4       | [68.72-70.15] |
| Rajasthan            | M          | 64.8       | [64.09-65.52] | 66.8        | [66.04-67.62] | 66.5       | [65.79-67.30] |
| Tamil Nadu           | M          | 69.4       | [68.74-70.02] | 67.8        | [67.08-68.56] | 70.2       | [69.52-70.93] |
| Telangana            | M          |            |               | 64.4        | [63.71-65.04] | 68.1       | [67.42-68.85] |
| Uttar Pradesh        | M          | 64.2       | [63.46-64.88] | 63.4        | [62.58-64.15] | 65.2       | [64.55-65.91] |
| Uttarakhand          | M          |            |               | 64.8        | [64.06-65.47] | 66.5       | [65.90-67.18] |
| West Bengal          | M          | 70.5       | [69.73-71.18] | 68.3        | [67.71-68.92] | 71.2       | [70.52-71.80] |
