# Supplementary material for: Premature adult mortality in India: what is the size of the matter?
Source: PubMed Central journal article supplement — BMJ Glob Health. 2021 Jun 16;6(6):e004451. doi: 10.1136/bmjgh-2020-004451 (PMC8211056; doi:10.1136/bmjgh-2020-004451), 2021-06-16

## Appendix 4A: Correspondence between Log-Quad and Mod-Match estimates for life expectancy at birth

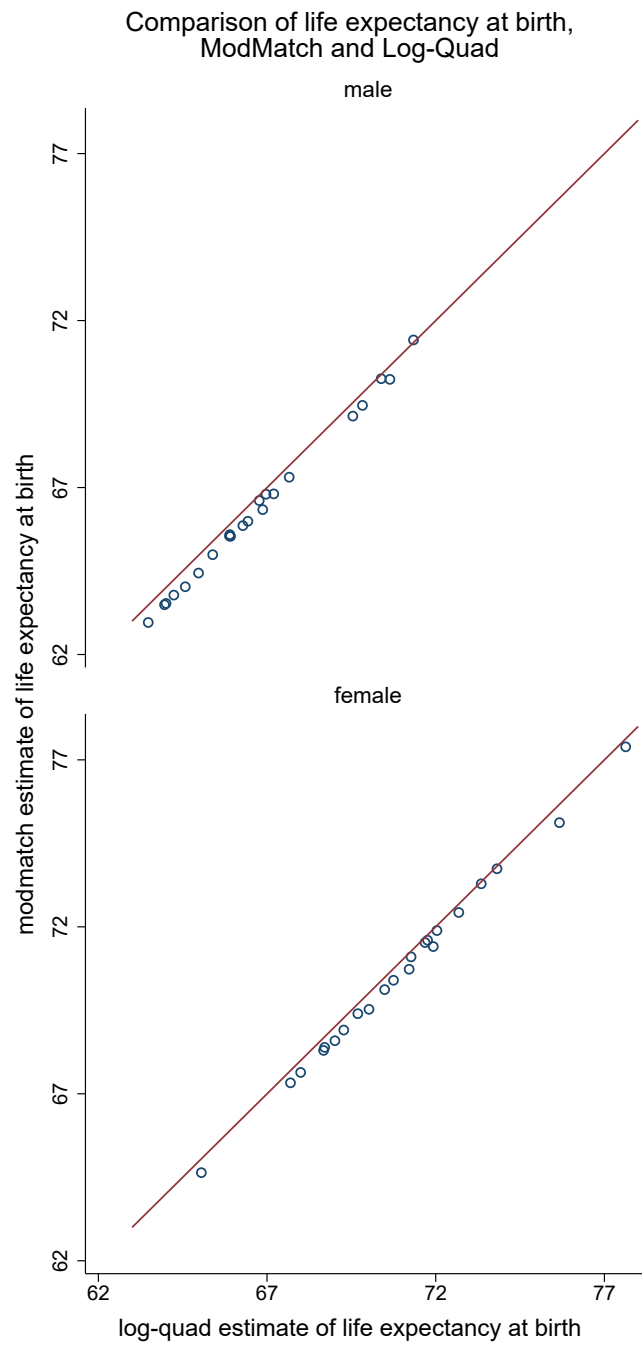

## Appendix 4B: Correspondence between Log-Quad and Mod-Match estimates

### Mortality rates, Female, ages 30-70, ModMatch & LogQuad

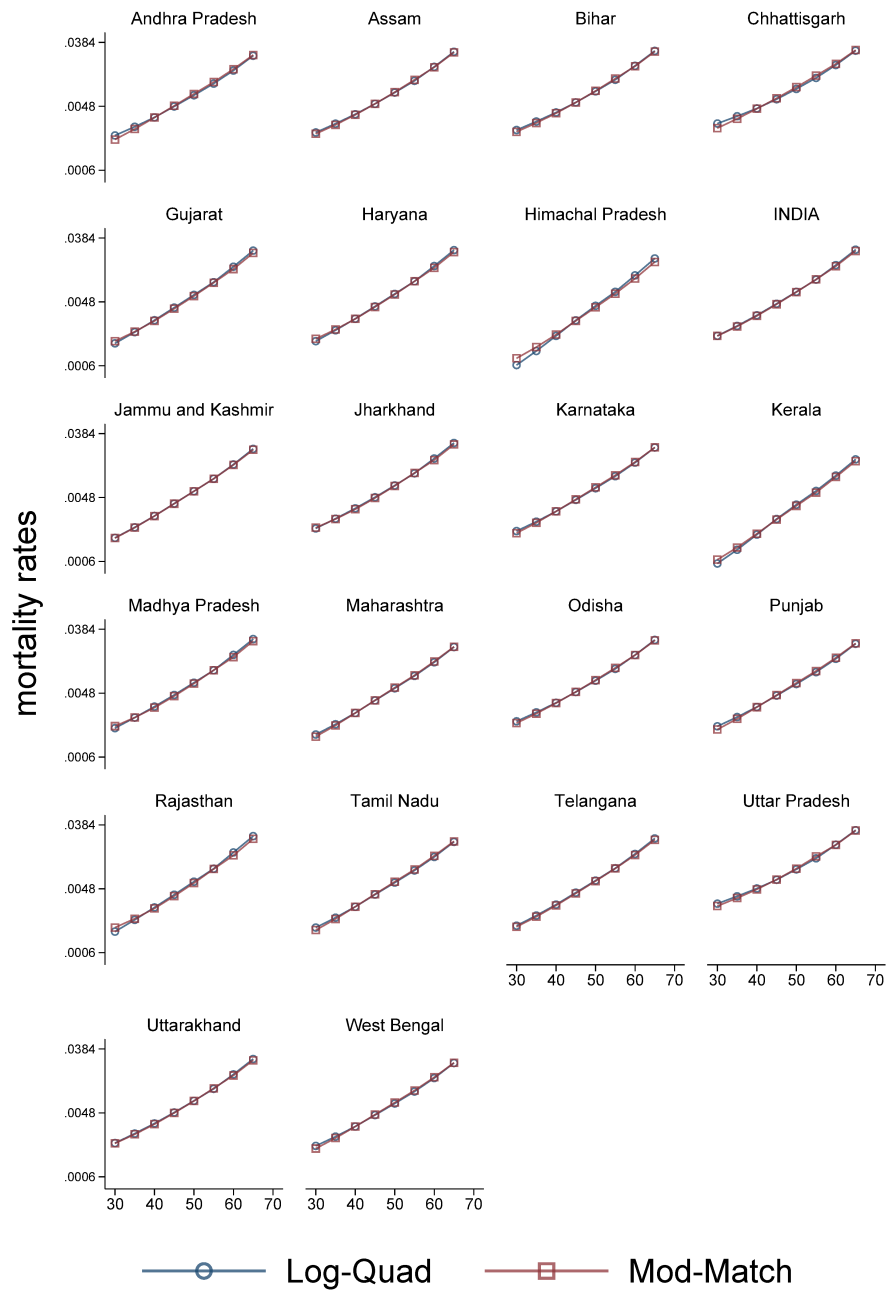

### Appendix 4C: Correspondence between Log-Quad and Mod-Match estimates

#### Mortality rates, Male, ages 30-70, ModMatch & LogQuad

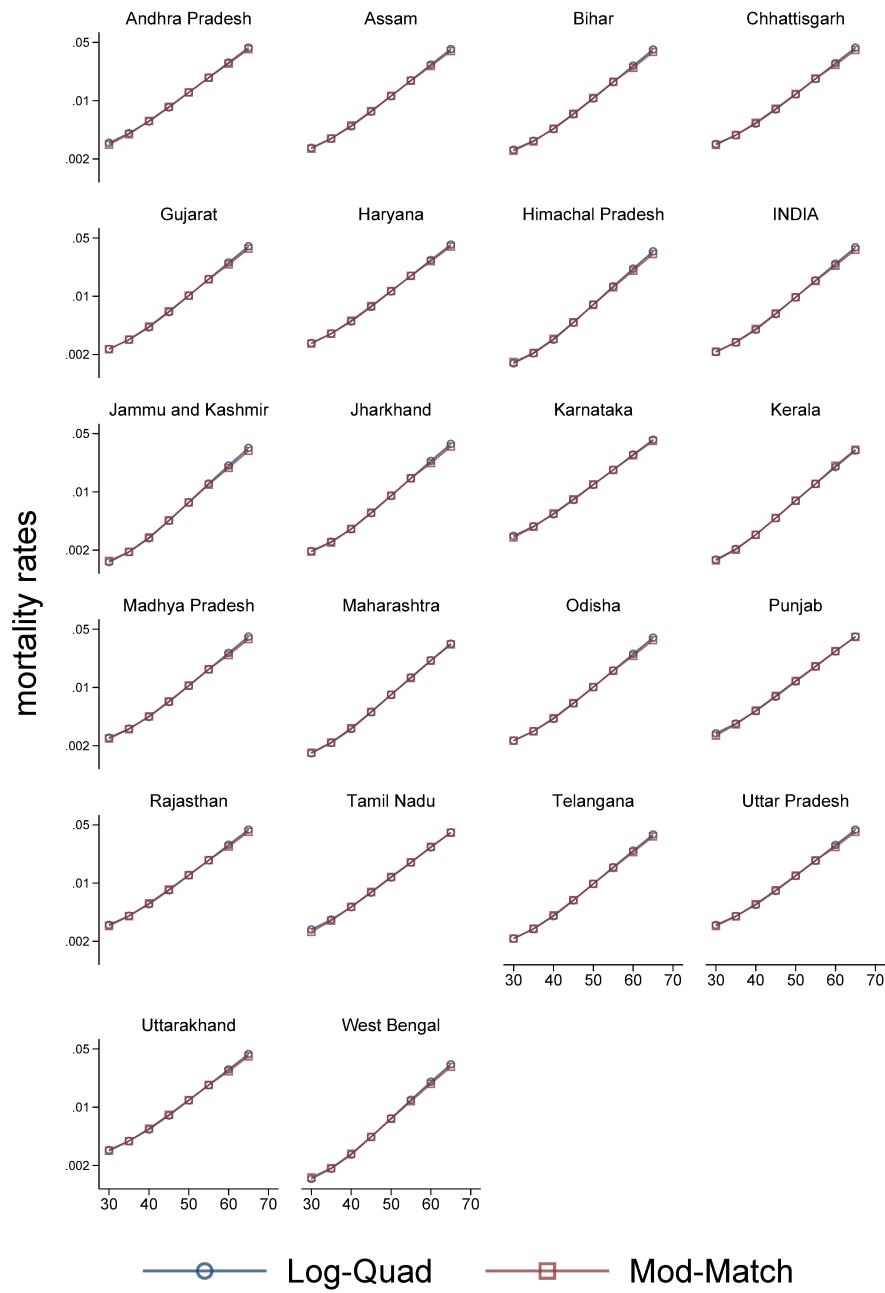

Supplement: bmjgh-2020-004451supp004.pdf [file bmjgh-2020-004451supp004.pdf]
