# Supplementary material for: Premature adult mortality in India: what is the size of the matter?
Source: PubMed Central journal article supplement — BMJ Glob Health. 2021 Jun 16;6(6):e004451. doi: 10.1136/bmjgh-2020-004451 (PMC8211056; doi:10.1136/bmjgh-2020-004451), 2021-06-16
Supplement: bmjgh-2020-004451supp005.pdf [file bmjgh-2020-004451supp005.pdf]

Appendix 5A: Estimated total population ('00,000s) and total deaths ('000s) between ages 30 and 70 years from different data sources for India and states, 2017

| Location          | MALES |        |      |        |          |        |      |        | FEMALES |        |      |        |          |        |      |        |
|-------------------|-------|--------|------|--------|----------|--------|------|--------|---------|--------|------|--------|----------|--------|------|--------|
|                   | CRS   |        | GBD  |        | MODMATCH |        | NBE  |        | CRS     |        | GBD  |        | MODMATCH |        | NBE  |        |
|                   | Pop   | Deaths | Pop  | Deaths | Pop      | Deaths | Pop  | Deaths | Pop     | Deaths | Pop  | Deaths | Pop      | Deaths | Pop  | Deaths |
| India             | 2682  | 2182   | 2805 | 2487   | 2682     | 2344   | 2870 | 2609   | 2625    | 1294   | 2725 | 1802   | 2625     | 1613   | 2732 | 1699   |
| Andhra            | 117   | 135    | 121  | 105    | 117      | 130    | NA   | NA     | 121     | 77     | 126  | 85     | 121      | 82     | NA   | NA     |
| Assam             | 68    | 57     | 71   | 66     | 68       | 65     | 72   | 59     | 65      | 50     | 67   | 44     | 65       | 42     | 67   | 36     |
| Bihar             | 200   | 93     | 214  | 142    | 200      | 192    | 217  | 150    | 192     | 57     | 201  | 135    | 192      | 138    | 199  | 132    |
| Chhattisgarh      | 55    | 64     | 59   | 79     | 55       | 56     | 59   | 63     | 55      | 46     | 58   | 53     | 55       | 44     | 58   | 39     |
| Gujarat           | 145   | 123    | 150  | 130    | 145      | 129    | 153  | 128    | 136     | 61     | 141  | 83     | 136      | 79     | 141  | 70     |
| Haryana           | 58    | 59     | 59   | 57     | 58       | 57     | 63   | 63     | 54      | 39     | 56   | 37     | 54       | 31     | 58   | 34     |
| Himachal          | 16    | 11     | 17   | 16     | 16       | 12     | NA   | NA     | 17      | 5      | 17   | 7      | 17       | 7      | NA   | NA     |
| Jammu and Kashmir | 27    | 11     | 28   | 17     | 27       | 18     | 29   | 18     | 24      | 8      | 25   | 12     | 24       | 12     | 25   | 10     |
| Jharkhand         | 68    | 42     | 73   | 51     | 68       | 55     | 72   | 55     | 66      | 26     | 68   | 56     | 66       | 43     | 68   | 47     |
| Karnataka         | 145   | 166    | 150  | 156    | 145      | 155    | 156  | 165    | 144     | 84     | 149  | 116    | 144      | 88     | 151  | 108    |
| Kerala            | 80    | 70     | 82   | 72     | 80       | 68     | 88   | 74     | 92      | 35     | 95   | 43     | 92       | 36     | 99   | 40     |
| Madhya Pradesh    | 154   | 131    | 162  | 150    | 154      | 140    | 166  | 164    | 147     | 82     | 155  | 99     | 147      | 89     | 154  | 90     |
| Maharashtra       | 271   | 187    | 277  | 218    | 271      | 201    | 286  | 227    | 257     | 111    | 267  | 161    | 257      | 137    | 269  | 154    |
| Odisha            | 92    | 96     | 103  | 91     | 92       | 88     | 104  | 94     | 95      | 66     | 100  | 70     | 95       | 65     | 99   | 62     |
| Punjab            | 66    | 71     | 70   | 59     | 66       | 71     | 71   | 62     | 64      | 46     | 68   | 42     | 64       | 40     | 68   | 36     |
| Rajasthan         | 138   | 152    | 145  | 143    | 138      | 146    | 148  | 152    | 136     | 67     | 141  | 85     | 136      | 74     | 141  | 73     |
| Tamil Nadu        | 180   | 194    | 194  | 185    | 180      | 197    | 201  | 179    | 186     | 111    | 198  | 126    | 186      | 106    | 200  | 109    |
| Telangana         | 80    | 60     | 84   | 63     | 80       | 68     | NA   | NA     | 82      | 46     | 85   | 47     | 82       | 47     | NA   | NA     |
| Uttar Pradesh     | 386   | 207    | 405  | 423    | 386      | 413    | 409  | 468    | 373     | 126    | 387  | 322    | 373      | 315    | 382  | 320    |
| Uttarakhand       | 21    | 10     | 23   | 24     | 21       | 23     | NA   | NA     | 22      | 5      | 23   | 13     | 22       | 14     | NA   | NA     |
| West Bengal       | 220   | 152    | 232  | 182    | 220      | 151    | 238  | 178    | 208     | 103    | 218  | 131    | 208      | 125    | 220  | 120    |

Appendix 5B: Estimated population cohort aged 30 years in 2017, risk of dying between 30 and 70 years/1000 in 2017, and expected deaths in cohort during 2017-2057 according to various sources

| Location          | CRS      |        |          |          |        |          | GBD      |        |          |          |        |          |
|-------------------|----------|--------|----------|----------|--------|----------|----------|--------|----------|----------|--------|----------|
|                   | Mpop 30y | M40q30 | MExpDths | Fpop 30y | F40q30 | FExpDths | Mpop 30y | M40q30 | MExpDths | Fpop 30y | F40q30 | FExpDths |
| India             | 10339637 | 373    | 3858654  | 10045151 | 247    | 2485776  | 11266237 | 390    | 4392636  | 10717001 | 306    | 3284138  |
| Andhra            | 433663   | 459    | 199267   | 447576   | 283    | 126499   | 464787   | 370    | 171863   | 470001   | 303    | 142577   |
| Assam             | 268776   | 440    | 118381   | 277004   | 417    | 115553   | 296086   | 434    | 128355   | 296738   | 344    | 102055   |
| Bihar             | 763193   | 235    | 179074   | 761566   | 160    | 122136   | 874604   | 313    | 274096   | 844123   | 315    | 266018   |
| Chhattisgarh      | 212336   | 521    | 110541   | 208703   | 402    | 83867    | 249985   | 558    | 139614   | 235653   | 396    | 93376    |
| Gujarat           | 571954   | 379    | 216748   | 514986   | 221    | 113963   | 622045   | 391    | 242989   | 552446   | 273    | 151057   |
| Haryana           | 242551   | 484    | 117399   | 217139   | 355    | 77015    | 251285   | 415    | 104217   | 228421   | 317    | 72448    |
| Himachal          | 59213    | 301    | 17844    | 60023    | 170    | 10214    | 62825    | 400    | 25100    | 63410    | 189    | 11968    |
| Jammu and Kashmir | 109848   | 246    | 27022    | 98350    | 193    | 18971    | 123800   | 300    | 37159    | 103235   | 249    | 25722    |
| Jharkhand         | 268050   | 302    | 80969    | 263014   | 207    | 54326    | 316640   | 332    | 105224   | 290797   | 369    | 107185   |
| Karnataka         | 567071   | 469    | 265782   | 555600   | 280    | 155632   | 617424   | 438    | 270642   | 599468   | 353    | 211516   |
| Kerala            | 241881   | 351    | 84843    | 275589   | 178    | 49043    | 239021   | 342    | 81687    | 272183   | 199    | 54134    |
| Madhya Pradesh    | 614206   | 414    | 254083   | 575052   | 286    | 164727   | 661231   | 412    | 272491   | 612593   | 306    | 187532   |
| Maharashtra       | 1071328  | 325    | 348153   | 979439   | 210    | 205560   | 1129370  | 349    | 393727   | 1040813  | 279    | 290190   |
| Odisha            | 326600   | 441    | 144061   | 355235   | 329    | 116700   | 387772   | 377    | 146254   | 382759   | 313    | 119909   |
| Punjab            | 257331   | 469    | 120728   | 240265   | 345    | 82947    | 276013   | 347    | 95698    | 259691   | 272    | 70515    |
| Rajasthan         | 562836   | 474    | 266596   | 537740   | 248    | 133159   | 617142   | 441    | 272221   | 570943   | 293    | 167434   |
| Tamil Nadu        | 623897   | 428    | 267247   | 651548   | 282    | 183457   | 691460   | 398    | 275185   | 695117   | 287    | 199712   |
| Telangana         | 317656   | 370    | 117527   | 326774   | 277    | 90360    | 357779   | 344    | 122930   | 360113   | 260    | 93510    |
| Uttar Pradesh     | 1540481  | 269    | 414542   | 1464806  | 179    | 262553   | 1669268  | 444    | 741209   | 1566816  | 370    | 579144   |
| Uttarakhand       | 83422    | 219    | 18293    | 84735    | 117    | 9890     | 93506    | 449    | 41992    | 91060    | 263    | 23982    |
| West Bengal       | 798413   | 334    | 266482   | 784930   | 258    | 202282   | 893303   | 359    | 321111   | 832925   | 295    | 245519   |

| Location          | MODMATCH |        |          |          |        |          | NBE      |        |          |          |        |          |
|-------------------|----------|--------|----------|----------|--------|----------|----------|--------|----------|----------|--------|----------|
|                   | Mpop 30y | M40q30 | MExpDths | Fpop 30y | F40q30 | FExpDths | Mpop 30y | M40q30 | MExpDths | Fpop 30y | F40q30 | FExpDths |
| India             | 10339637 | 394    | 4068803  | 10045151 | 290    | 2910524  | 11534248 | 396    | 4571333  | 10684615 | 297    | 3175245  |
| Andhra            | 433663   | 457    | 198040   | 447576   | 301    | 134720   | NA       | NA     | NA       | NA       | NA     | NA       |
| Assam             | 268776   | 432    | 116081   | 277004   | 321    | 88789    | 298362   | 380    | 113374   | 298715   | 285    | 85087    |
| Bihar             | 763193   | 419    | 319711   | 761566   | 330    | 251576   | 918294   | 318    | 292321   | 804818   | 316    | 254412   |
| Chhattisgarh      | 212336   | 447    | 94826    | 208703   | 354    | 73851    | 257952   | 478    | 123337   | 238970   | 325    | 77566    |
| Gujarat           | 571954   | 406    | 231945   | 514986   | 267    | 137507   | 651506   | 389    | 253742   | 551665   | 252    | 139071   |
| Haryana           | 242551   | 435    | 105552   | 217139   | 276    | 60006    | 255790   | 421    | 107709   | 216405   | 273    | 59098    |
| Himachal          | 59213    | 346    | 20505    | 60023    | 199    | 11935    | NA       | NA     | NA       | NA       | NA     | NA       |
| Jammu and Kashmir | 109848   | 334    | 36643    | 98350    | 263    | 25853    | 125930   | 305    | 38459    | 107785   | 202    | 21768    |
| Jharkhand         | 268050   | 376    | 100913   | 263014   | 307    | 80617    | 295071   | 343    | 101093   | 271028   | 318    | 86274    |
| Karnataka         | 567071   | 450    | 255276   | 555600   | 287    | 159397   | 635641   | 433    | 275239   | 576196   | 321    | 185107   |
| Kerala            | 241881   | 345    | 83521    | 275589   | 180    | 49733    | 256843   | 341    | 87506    | 300379   | 196    | 58736    |
| Madhya Pradesh    | 614206   | 414    | 254439   | 575052   | 294    | 169013   | 710195   | 448    | 318198   | 638544   | 297    | 189609   |
| Maharashtra       | 1071328  | 354    | 379319   | 979439   | 254    | 249140   | 1122147  | 352    | 395090   | 1035334  | 271    | 280758   |
| Odisha            | 326600   | 404    | 131823   | 355235   | 311    | 110328   | 398873   | 393    | 156626   | 416618   | 298    | 123985   |
| Punjab            | 257331   | 445    | 114449   | 240265   | 285    | 68568    | 282377   | 354    | 99881    | 262482   | 240    | 63103    |
| Rajasthan         | 562836   | 455    | 256315   | 537740   | 270    | 145376   | 642889   | 456    | 293300   | 577360   | 262    | 151458   |
| Tamil Nadu        | 623897   | 442    | 275748   | 651548   | 264    | 172010   | 750955   | 383    | 287937   | 732184   | 259    | 189821   |
| Telangana         | 317656   | 395    | 125460   | 326774   | 273    | 89189    | NA       | NA     | NA       | NA       | NA     | NA       |
| Uttar Pradesh     | 1540481  | 453    | 697196   | 1464806  | 370    | 542266   | 1758353  | 471    | 828747   | 1512212  | 373    | 564799   |
| Uttarakhand       | 83422    | 450    | 37533    | 84735    | 306    | 25914    | NA       | NA     | NA       | NA       | NA     | NA       |
| West Bengal       | 798413   | 328    | 261552   | 784930   | 288    | 225675   | 849055   | 344    | 292385   | 832148   | 290    | 241293   |
