# Supplementary figures and images for: Premature adult mortality in India: what is the size of the matter?
Source: PubMed Central journal article supplement — BMJ Glob Health. 2021 Jun 16;6(6):e004451. doi: 10.1136/bmjgh-2020-004451 (PMC8211056; doi:10.1136/bmjgh-2020-004451), 2021-06-16

## Appendix 6A: Divergence between NBE and GBD estimates

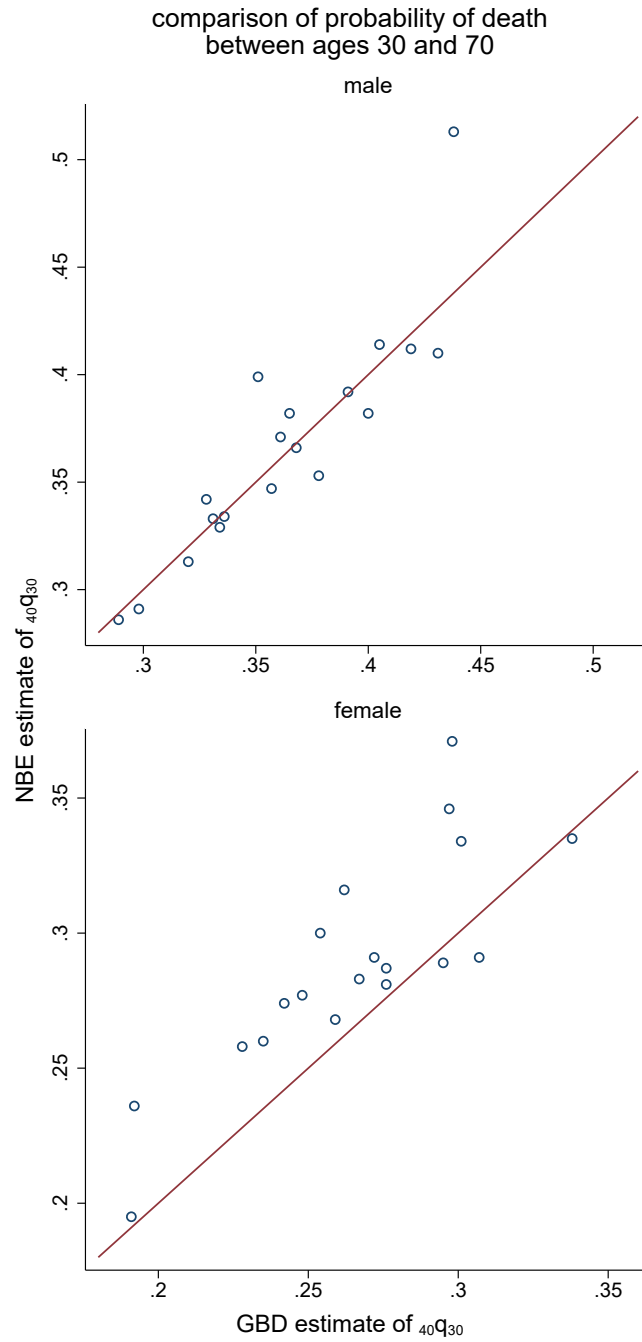

Supplement: bmjgh-2020-004451supp006.pdf [file bmjgh-2020-004451supp006.pdf]
